# Supplementary material for: Synthesis of 2-(3,5-diarylaminophenyl)-2H-benzo[d][1,2,3]triazoles with aggregation induced emission properties and its applications as a blue OLED component
Source: Research Square preprint supplement (doi:10.21203/rs.3.rs-8151940/v1), 2025-12-04
Supplement: Supplementary file 1 [file a96e7340711c25742b269579.docx]

**Supporting Information**

Synthesis of 2-(3,5-diarylaminophenyl)-2*H*-benzo[*d*][1,2,3]triazoles with aggregation induced emission properties and its applications as a blue OLED component

Zhichao Wang, Xu Wu, Mingzhi Huang and Jinhao Zhao*

**Experimental Procedures**

**Material and Instruments**

Unless otherwise mentioned, solvents and reagents were purchased from commercial sources and used as received. For the purpose of the measurement of photophysical properties, THF was distilled from sodium. Melting points were measured with a micro melting point apparatus. Infrared spectra were obtained with an FTIR spectrometer. NMR spectra were operated at 400 MHz for 1H NMR, 101 MHz for 13C NMR. All the NMR spectra were recorded at room temperature. Chemical shifts were quoted in parts per million (ppm) referred to the appropriate solvent peak or 0.0 ppm for tetramethylsilane. The following abbreviations are used to describe peak patterns as appropriate: s = singlet, d = doublet, t = triplet, q = quartet, m = multiplet. Coupling constants J were reported in hertz. High-resolution mass spectra (HRMS) data were obtained with matrix-assisted laser desorption ionization time-of-flight (MLADI-TOF) mass spectrometer. Flash column chromatography was performed employing 300-400 mesh silica gel. Thin layer chromatography (TLC) was performed on silica gel HSGF254. The absorption spectra were measured using UV-vis spectrometer. FL spectra were recorded on a fluorospectro photometer with a xenon lamp excitation source. Thermogravimetric Analysis (TGA) was obtained with a thermal analyzer at heating and cooling rates of 10 K/min under an N2 atmosphere.

Device Fabrication: before device fabrication, the ITO glass substrates were pre-cleaned carefully. Then hole transporting material PEDOT: PSS was made with 4000 r/s for 45 s and annealing 25 min at 150oC. Emission Layer was prepared in chlorobenzene. Then it was made with 3000 r/s for 50 s and annealing 20 min at 100oC. After the organic film deposition, 40 nm of TPBi, 1.5 nm of LiF and 1000 nm of aluminium were thermally evaporated onto the organic surface.

**General procedure for synthesis of organic molecular**

1. Synthesis of 2-(3,5-dibromophenyl)-2*H*-benzo[*d*][1,2,3]triazole1

**Figure S1** Synthesis of 2-(3,5-dibromophenyl)-2*H*-benzo[*d*][1,2,3]triazole

Oxone (40g, 65.2mmol) was treated with 48mL of concentrated H2SO4. The suspension was then poured onto 260g of ice, and the mixture was stirred at room temperature until all of the ice had melted. 2-nitroaniline (6.00g, 43.4mmol) was added and stirred vigorously for 20 h. The mixture was extracted with DCM and dried over anhydrous Na2SO4. The solvent was evaporated under vacuum, and the residue was purified by flash column chromatography with petroleum ether: DCM = 1:1, collected the cyan eluent. The resulting product was recrystallized with ethanol to give 1-nitro-2-nitrosobenzene as a cyan solid, yield 87%. A solution of 3,5-dibromoaniline (2.5g, 10mmol) and 1-nitro-2-nitrosobenzene (1.8g, 12mmol) was stirred in acetic acid (50mL) for 14 h at room temperature. The solution was poured on ice, and the resulting solid was collected by filtration and purified by crystallization from ethanol. The resulting precipitate is directly used in the next step. The previous product (1.9g, 5mmol) was dissolved in a mixture of t-BuOH (42mL) and 4M aqueous NaOH (36mL). The solution was stirred at 80°C when formamidinesulfinic acid (2.4g, 22.5mmol) was added in portions. After stirring for 16 h, the mixture was poured on ice. The resulting solid was collected by filtration and purified by flash column chromatography with petroleum ether: DCM = 4:1 to afford the 2-(3,5-dibromophenyl)-2*H*-benzo[*d*][1,2,3]triazole as a colorless needles, yield 55%. 1H NMR (400 MHz, Chloroform-*d*) δ 8.52 (d, *J* = 1.5 Hz, 2H), 7.91 (dd, *J* = 6.6, 3.1 Hz, 2H), 7.74 (t, *J* = 1.6 Hz, 1H), 7.45 (dd, *J* = 6.6, 3.1 Hz, 2H).

1. Synthesis of compounds **1a, 1b, 1c, 1d, 1e**

All compounds were synthesized by reaction with diarylamine according to Buchwald-Hartwig coupling. 2-(3,5-dibromophenyl)-2*H*-benzo[*d*][1,2,3]triazole(1eq), Pd2(dba)3(0.1eq), (t-Bu)3PH+BF4-(0.3eq), t-BuONa(4eq) and diarylamine(2.2eq) were added into the Schrenk tube. After replacing the air with N2, toluene(1mL/0.1mmol) was added to dissolve the reactants. The mixture was stirred and refluxed overnight under N2. After cooling to room temperature, the solvent was removed via vacuum. The residue was purified by flash column chromatography to afford the desired products.

**Compound 1a**: DCM: PE = 1:4 as eluent, milky powder, yield 99%, mp 253-254°C. 1H NMR (400 MHz, CDCl3): δ 8.77 (d, *J* = 1.9 Hz, 2H), 8.19 (d, *J* = 7.7 Hz, 4H), 7.99 – 7.88 (m, 3H), 7.67 (d, *J* = 8.2 Hz, 4H), 7.54 – 7.42 (m, 6H), 7.40 – 7.32 (m, 4H).13C NMR (101 MHz, CDCl3): δ 145.4, 142.8, 140.5, 140.4, 127.9, 126.4, 124.8, 123.9, 120.8, 120.6, 118.6, 117.5, 109.8. HRMS (ESI-TOF): cacld. for C36H23N5 [M+H]+, 526.2026; found: 526.2025. IR (cm-1): 3061, 1603, 1578, 1493, 1331, 872, 772, 745, 722, 701.


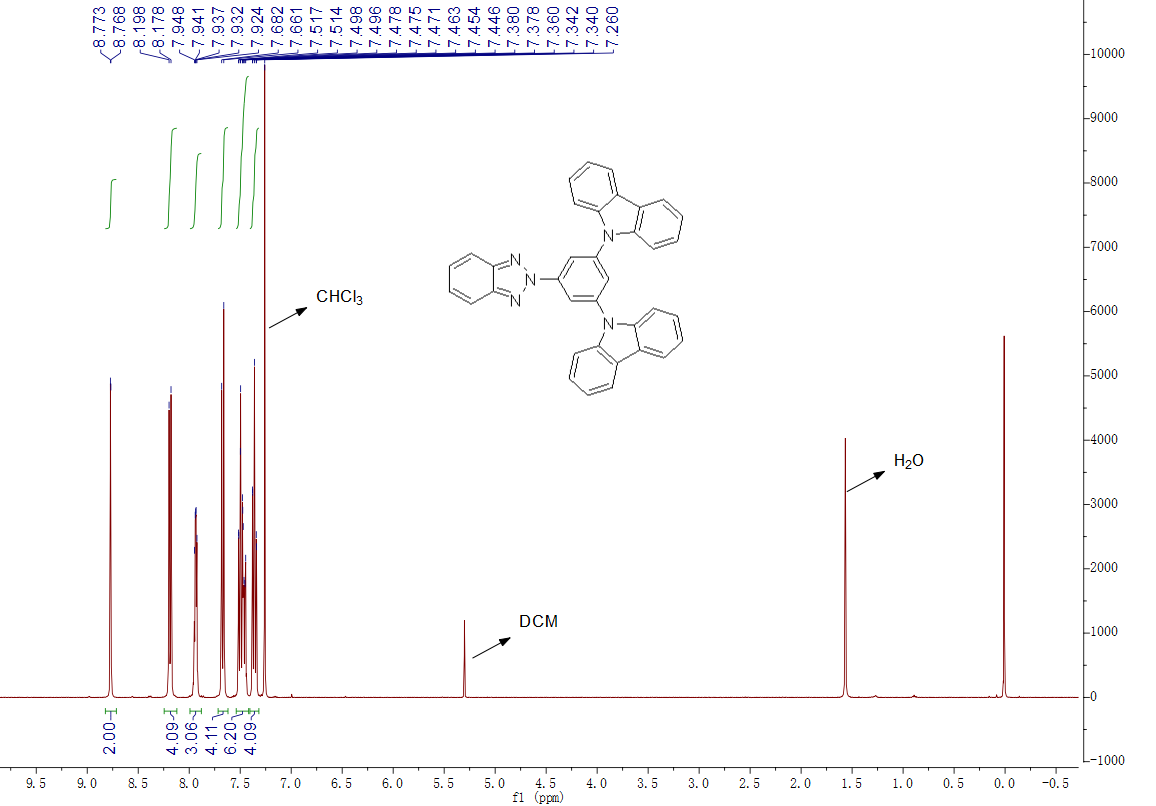


**Figure S2** 1H NMR of **1a** in CDCl3

**
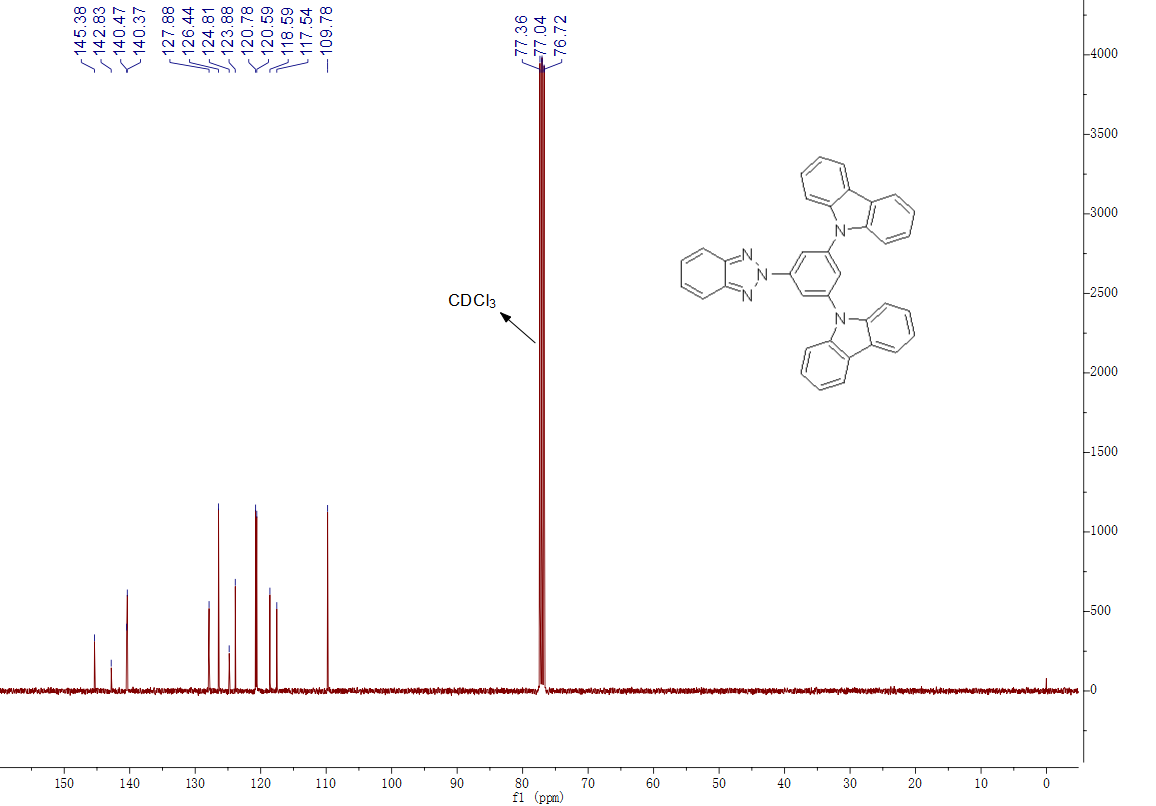
**

**Figure S3** 13C NMR of **1a** in CDCl3

**Compound 1b:** DCM: PE = 1:2 as eluent, light yellow powder, yield 97%, mp 230-231°C. 1H NMR (400 MHz, CDCl3): δ 7.81 (dd, *J* = 6.4, 2.8 Hz, 2H), 7.61 (s, 2H), 7.33 (dd, *J* = 6.5, 2.8 Hz, 2H), 7.24 (t, *J* = 7.5 Hz, 8H), 7.13 (d, *J* = 7.7 Hz, 8H), 7.01 (t, *J* = 7.1 Hz, 4H), 6.84 (s, 1H).13C NMR (101 MHz, CDCl3): δ 149.5, 147.1, 144.9, 142.1, 129.4, 127.1, 124.6, 123.4, 118.3, 109.5, 77.4, 77.1, 76.8. HRMS (ESI-TOF): cacld. for C36H27N5 [M+H]+, 530.2339; found: 530.2342. IR (cm-1): 3059, 1609, 1588, 1491, 1306, 852, 760, 749, 695.


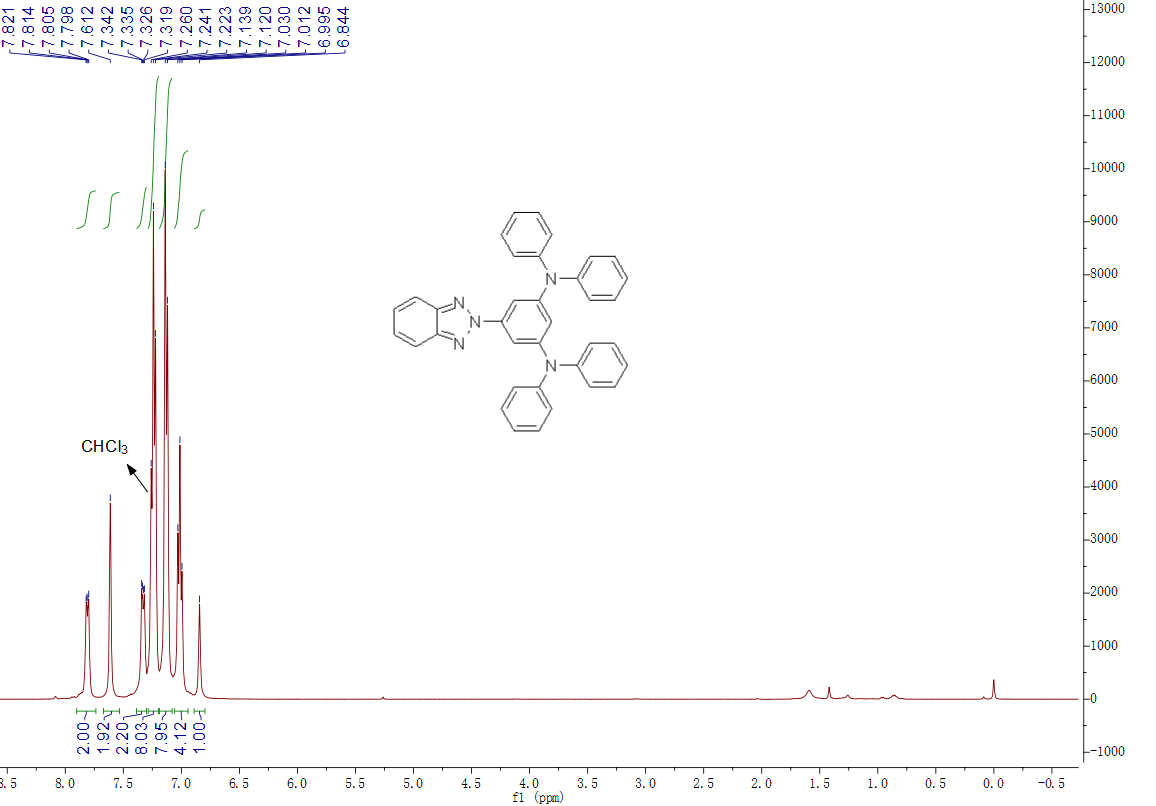


**Figure S4** 1H NMR of **1b** in CDCl3


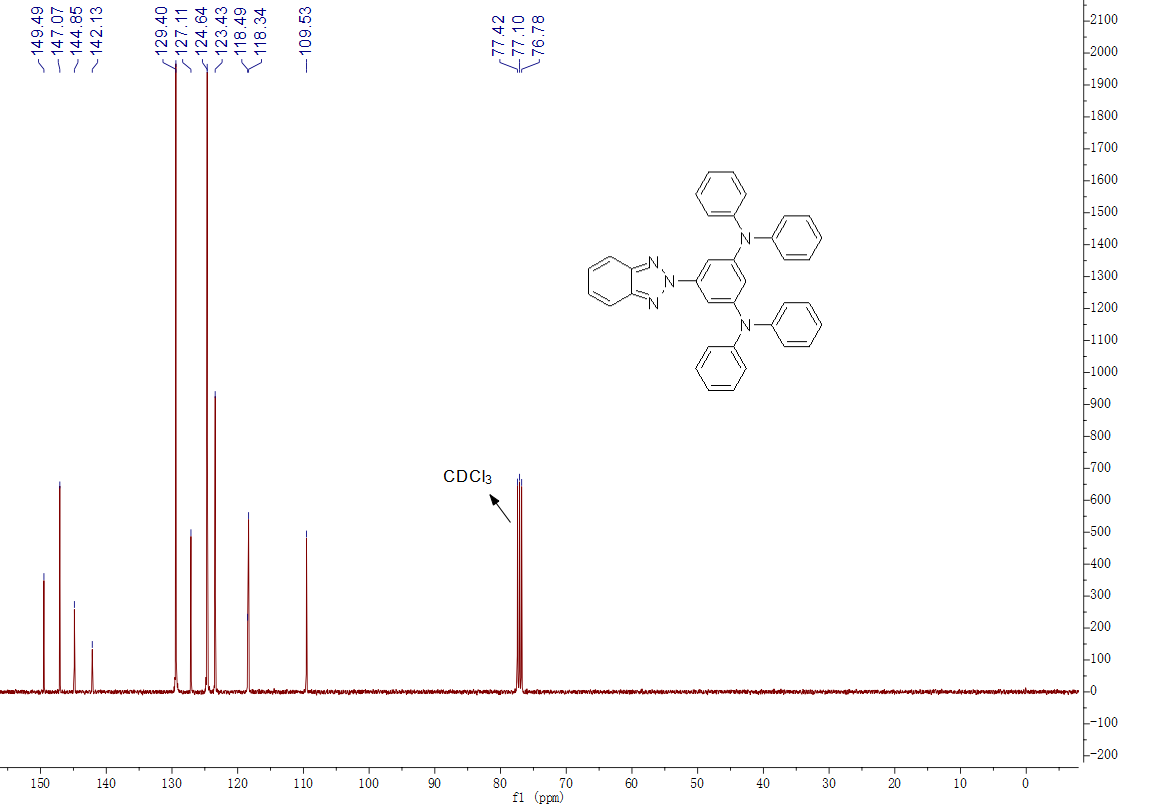


**Figure S5** 13C NMR of **1B** in CDCl3

**Compound 1c**: DCM: PE = 1:2 as eluent, greenish yellow powder, yield 99%, mp 221-222°C. 1H NMR (400 MHz, CDCl3): δ 7.83 (dd, *J* = 6.6, 3.1 Hz, 2H), 7.49 (d, *J* = 2.1 Hz, 2H), 7.35 (dd, *J* = 6.6, 3.1 Hz, 2H), 7.03 (q, *J* = 8.6 Hz, 16H), 6.71 (t, *J* = 2.0 Hz, 1H), 2.30 (s, 12H).13C NMR (101 MHz, CDCl3): δ 149.6, 144.8, 144.7, 141.9, 132.8, 129.9, 126.9, 124.7, 118.3, 116.9, 108.1, 77.4, 77.0, 76.7, 20.9. HRMS (ESI-TOF): cacld. for C40H35N5 [M+H]+, 586.2965; found: 586.2964. IR (cm-1): 3026, 2917, 1587, 1508, 1440, 1314, 813, 760, 709, 686.


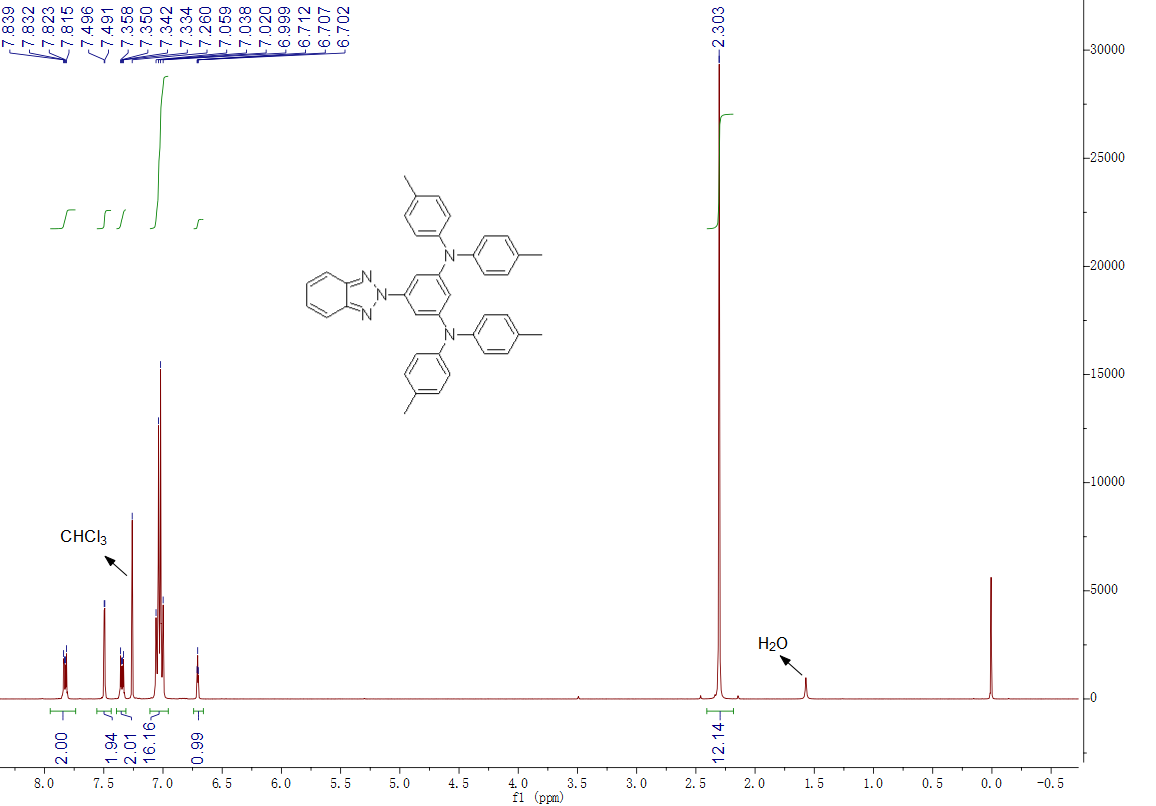


**Figure S6** 1H NMR of **1c** in CDCl3


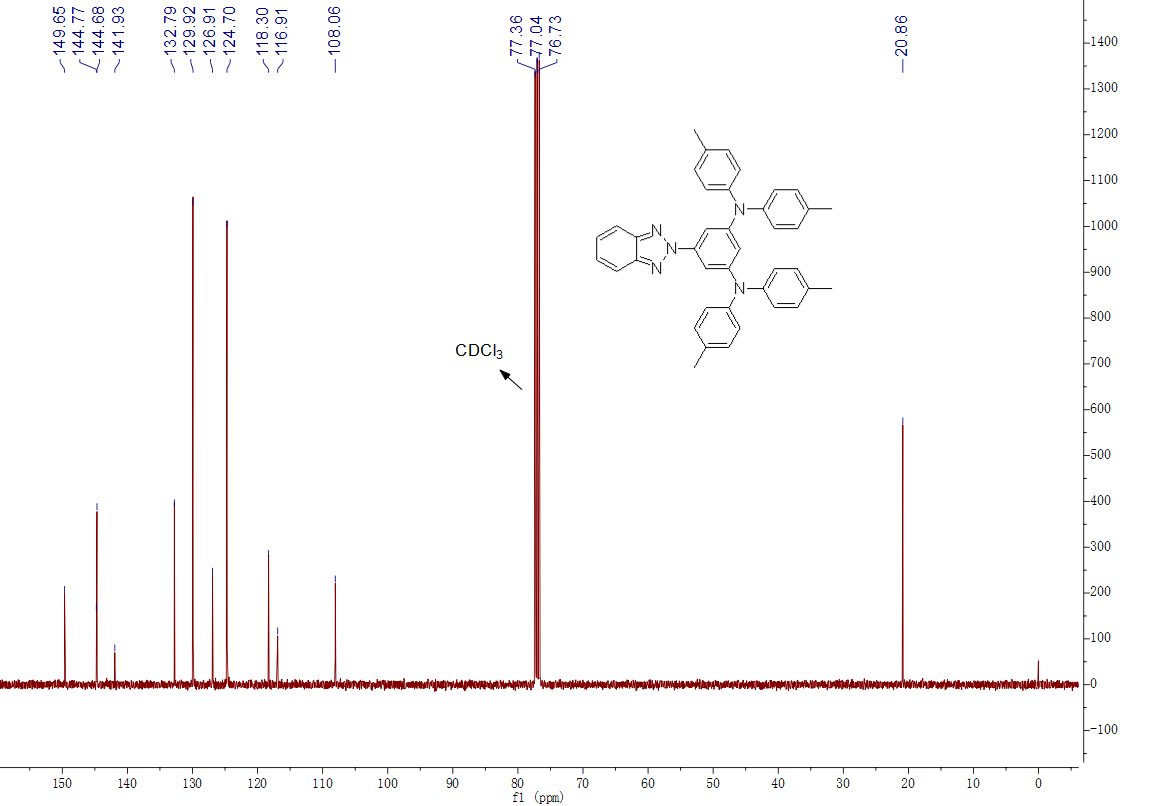


**Figure S7** 13C NMR of **1c** in CDCl3

**Compound 1d**: DCM: PE = 1:4 as eluent, yellow powder, yield 99%, mp 230-231°C. 1H NMR (400 MHz, CDCl3): δ 8.57 (d, *J* = 1.8 Hz, 2H), 7.90 (dd, *J* = 6.6, 3.1 Hz, 2H), 7.52 (m, 1H), 7.44 (dd, *J* = 6.7, 3.0 Hz, 2H), 6.79 – 6.64 (m, 12H), 6.15 (dd, *J* = 7.6, 1.5 Hz, 4H).13C NMR (101 MHz, CDCl3): δ 145.3, 144.9, 144.0, 143.1, 134.1, 133.5, 128.0, 123.5, 123.3, 122.2, 118.5, 116.0, 113.4, 77.4, 77.0, 76.7. HRMS (ESI-TOF): cacld. for C36H23N5O2 [M+H]+, 557.1846; found: 557.1844. IR (cm-1): 3071, 1592, 1489, 1330, 1274, 1046, 880, 780, 740, 701.


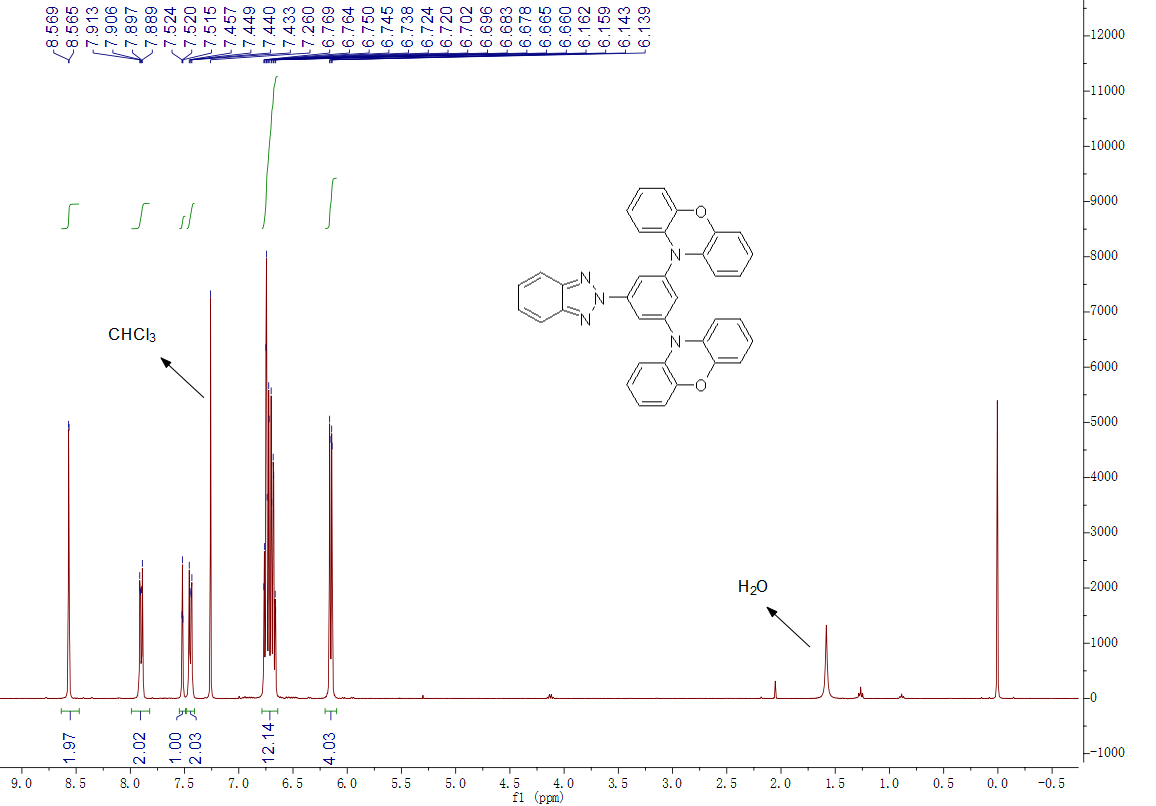


**Figure S8** 1H NMR of **1d** in CDCl3


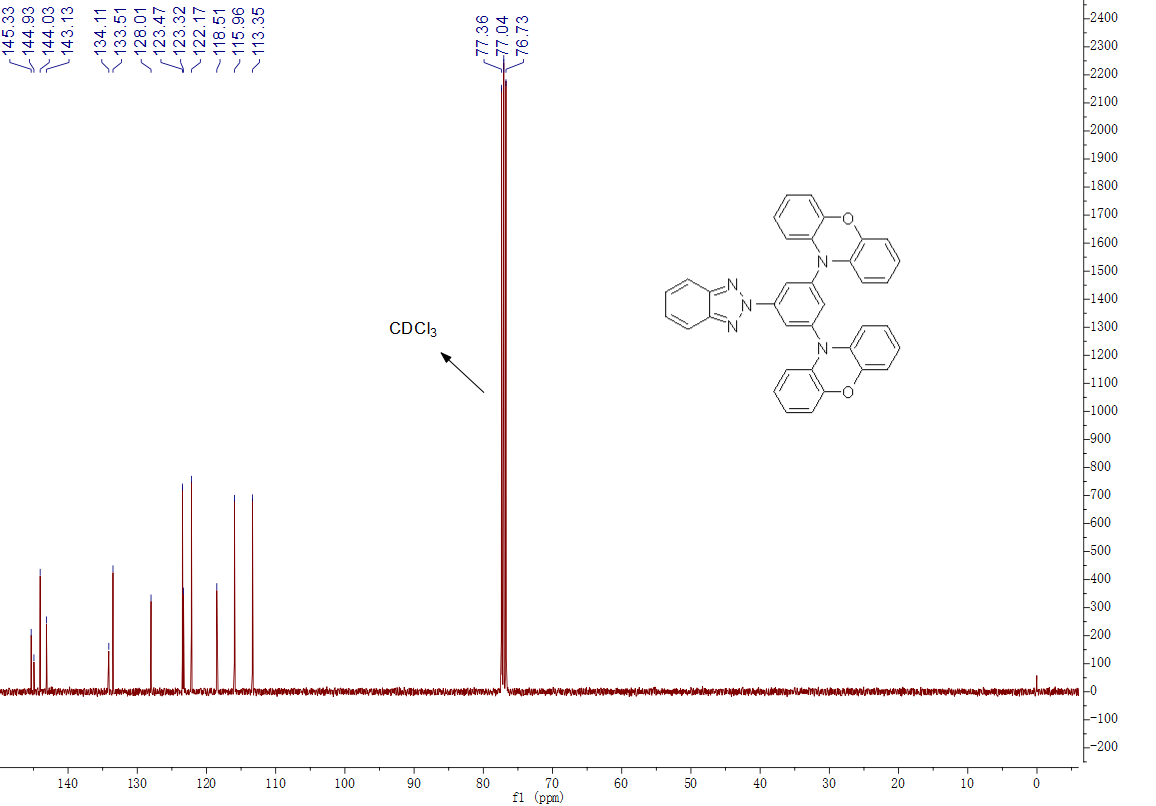


**Figure S9** 13C NMR of **1d** in CDCl3

**Compound 1e**: DCM: PE = 1:1 as eluent, brownish yellow powder, yield 99%, mp 249-250°C. 1H NMR (400 MHz, CDCl3): δ 7.82 (dd, *J* = 6.6, 3.1 Hz, 2H), 7.32 (dd, *J* = 6.6, 3.1 Hz, 2H), 7.25 (s, 2H), 7.10 – 6.98 (m, 8H), 6.72 – 6.59 (m, 9H), 2.91 (s, 24H), 13C NMR (101 MHz, CDCl3): δ 147.1, 144.7, 126.5, 126.4, 118.3, 113.8, 77.4, 77.0, 76.7, 41.1. HRMS (ESI-TOF): cacld. for C44H47N9 [M+H]+, 701.3949; found: 701.395. IR (cm-1): 3060, 1598, 1515, 1443, 1345, 1320, 816, 747, 669.


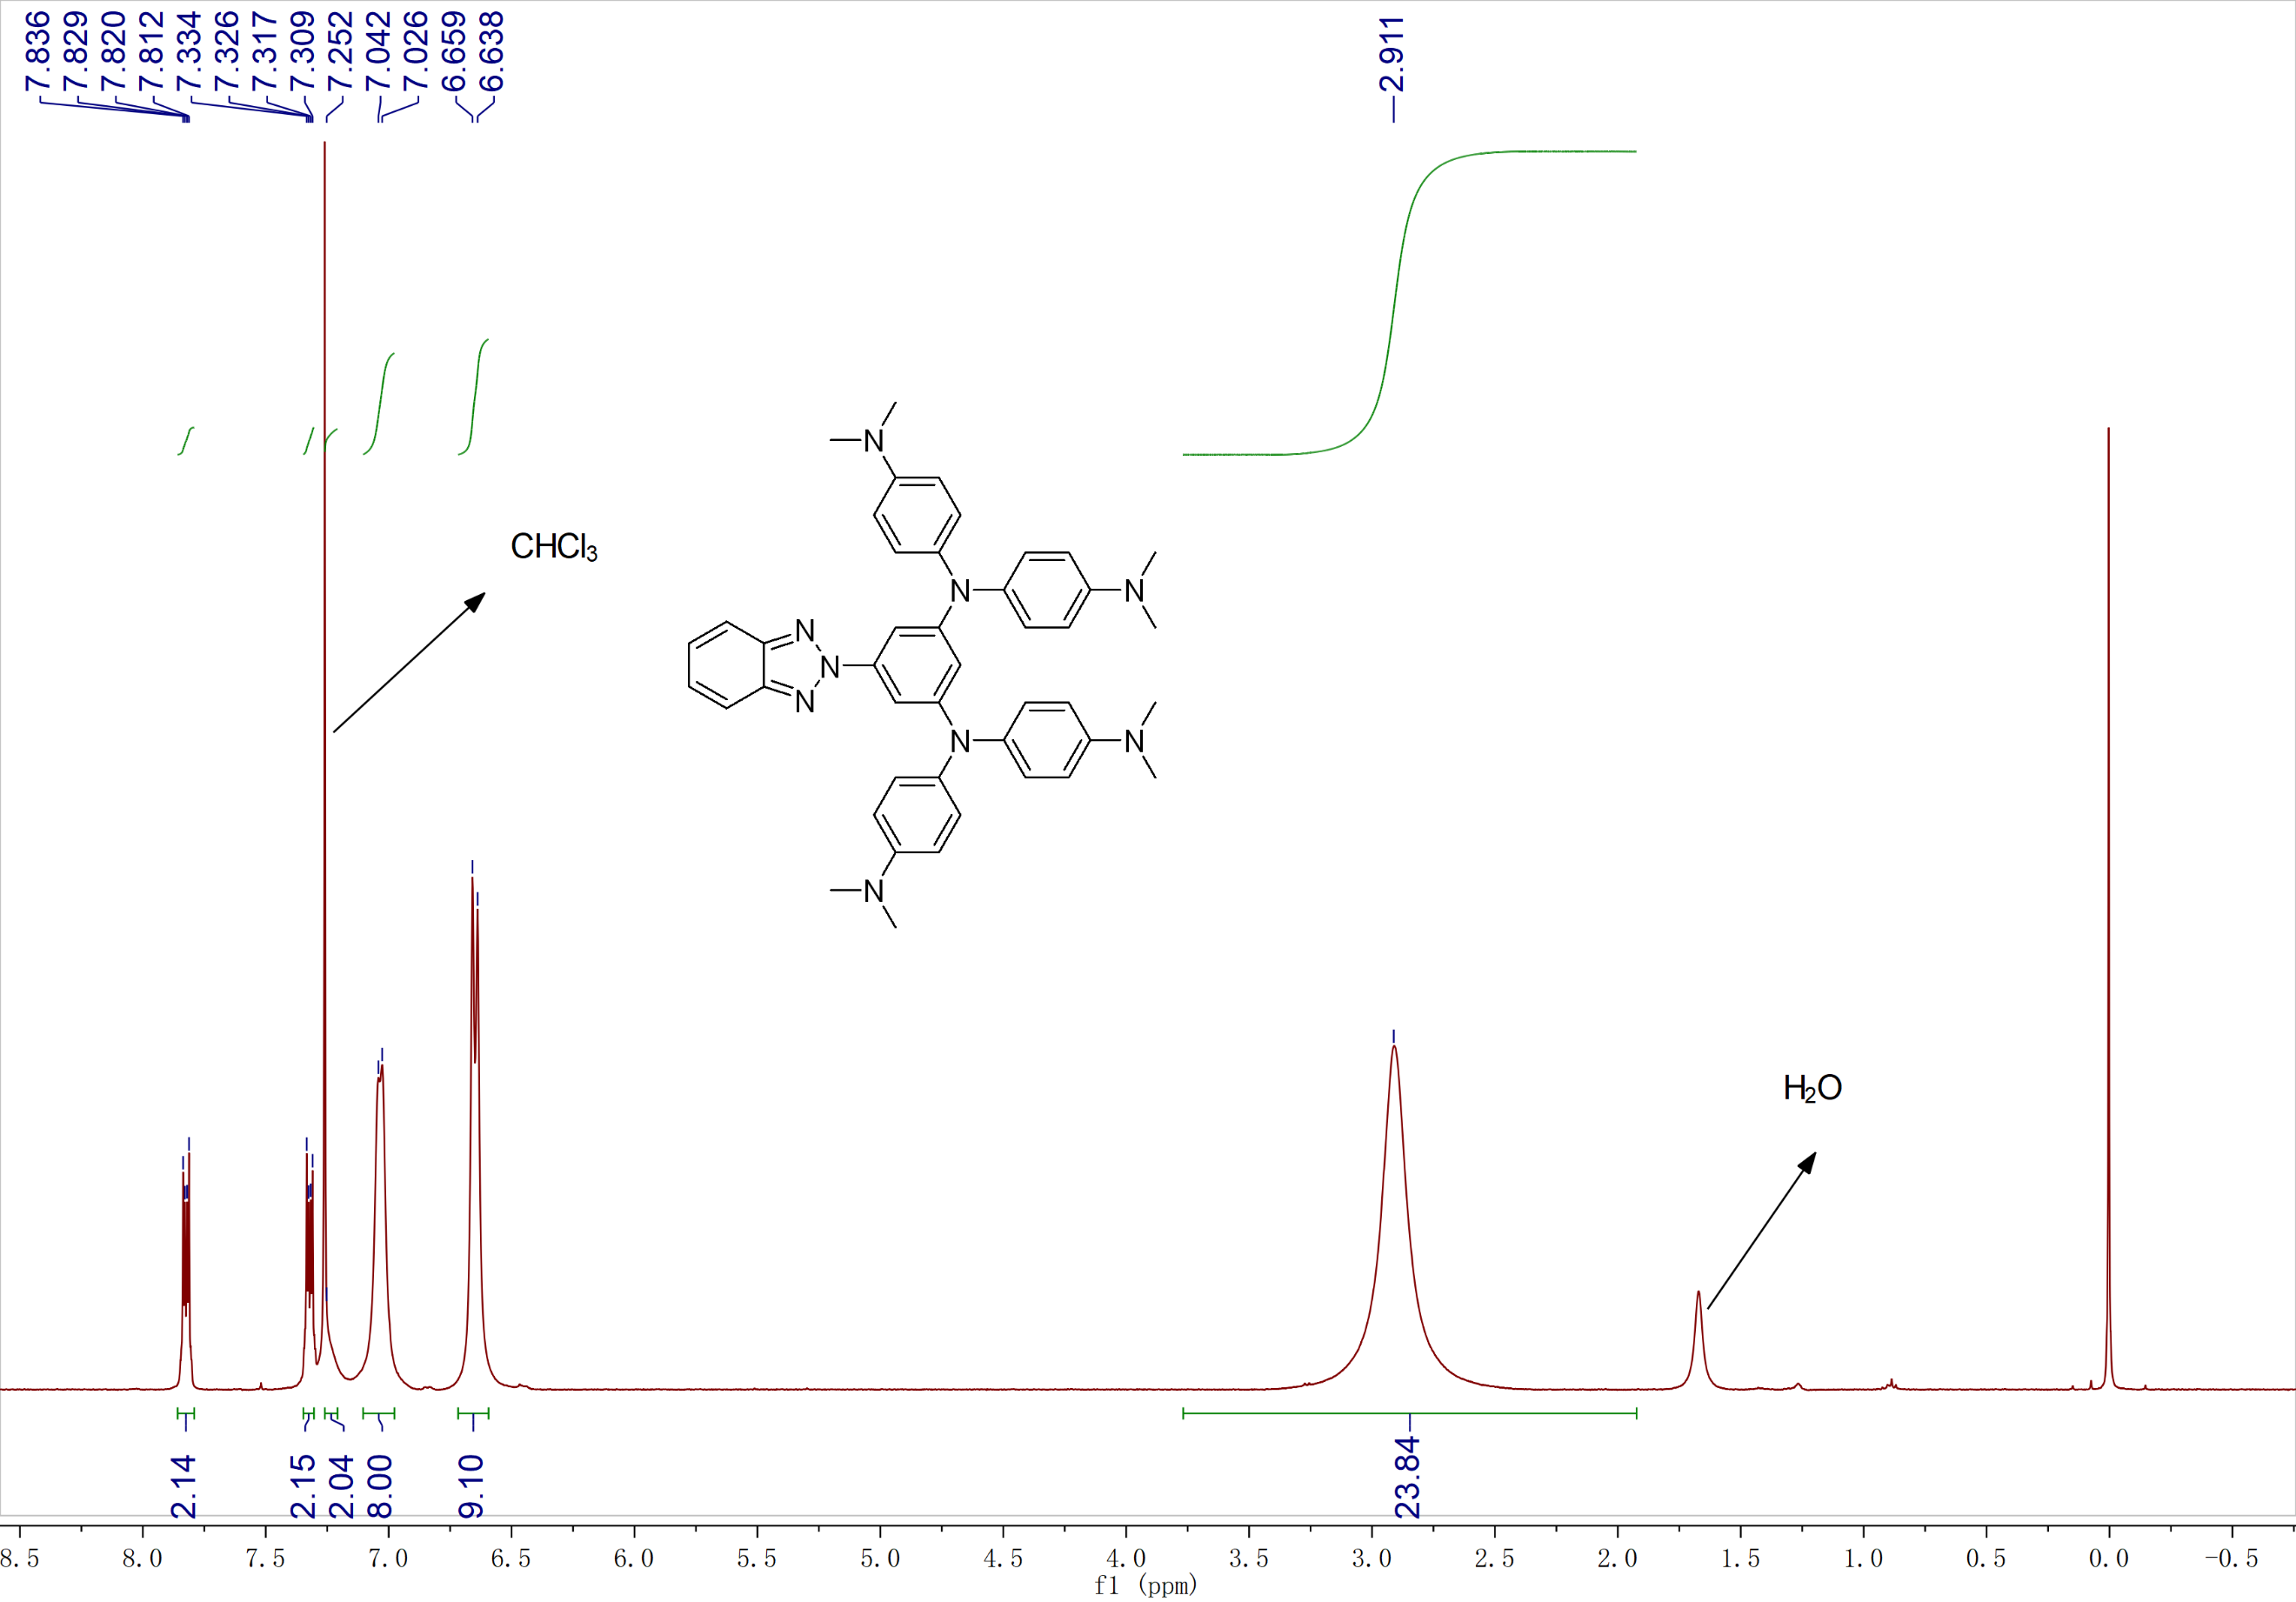


**Figure S10** 1H NMR of **1e** in CDCl3


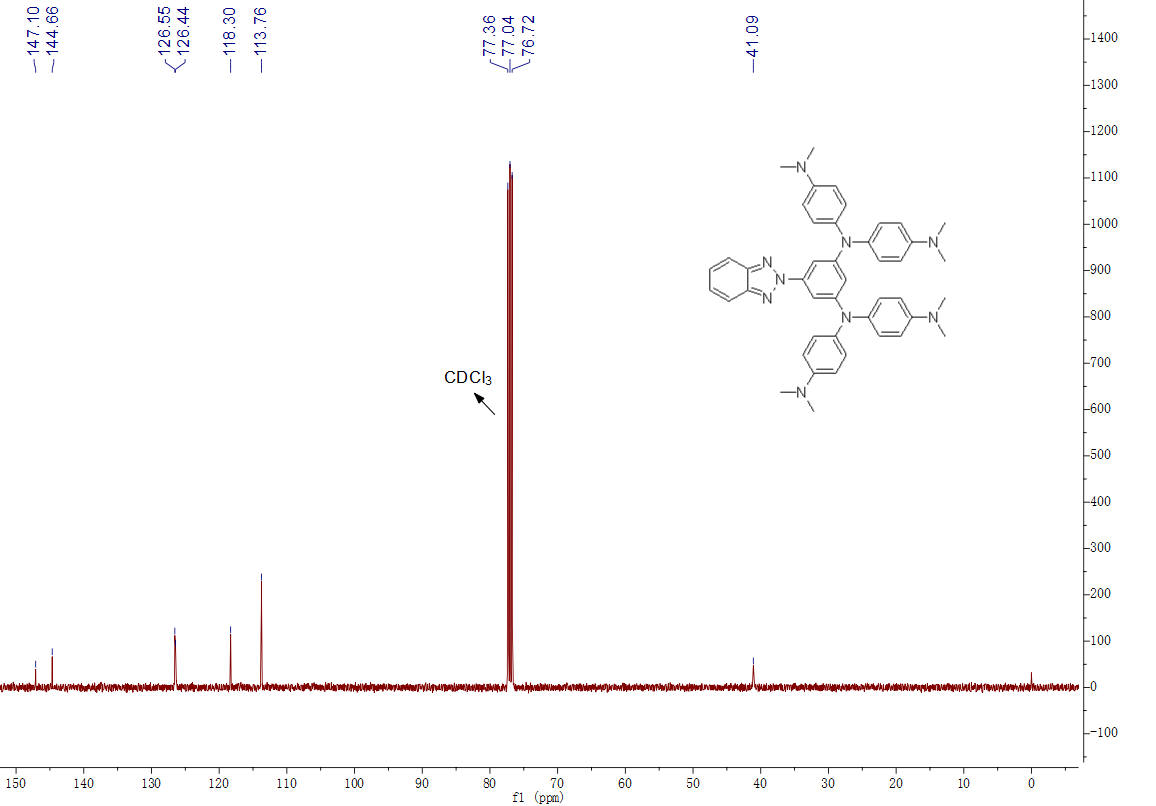


**Figure S11** 13C NMR of **1e** in CDCl3

**Table S1** Single crystal data

| Compunds | 1b | 1c | 1d |
| --- | --- | --- | --- |
| Formula | C36H27N5 | C40H35N5 | C36H23N502 |
| CCDC | 2118387 | 2118392 | 2118391 |
| a [Å] | 12.3727 | 7.643 | 22.589 |
| b [Å] | 18.5148 | 14.586 | 24.078 |
| c [Å] | 12.0455 | 15.485 | 4.839 |
| α [ ° ] | 90 | 85.476 | 90 |
| β [ ° ] | 95.804 | 86.875 | 90 |
| γ [ ° ] | 90 | 81.720 | 90 |
| Z | 4 | 2 | 4 |
| V [Å3] | 2745.21 | 1701.3 | 2632 |
| D [g cm-3] | 1.281 | 1.143 | 1.407 |
| Space group | P 21/c | P -1 | P n a 21 |
| Hall group | -P 2ybc | -P 1 | P 2c -2n |
| Mu [mm-1] | 0.077 | 0.068 | 0.090 |
| R (reflections) | 0.0384 | 0.0454 | 0.0343 |
| wR2 (reflections) | 0.0988 | 0.1288 | 0.0825 |





**Figure S12** Thermogravimetric Analysis of 5 compounds

**Table S2** Photophysical properties:

| **Compounds** | | **1a** | **1b** | **1c** | **1d** | **1e** |
| --- | --- | --- | --- | --- | --- | --- |
| FL in powder(nm) | | 413 | 468 | 480 | 505 | 556 |
| CH | Abs(nm) | 310 | 306 | 306 | 315 | 317 |
| ε(L·mol-1·cm-1) | 28150 | 62150 | 59750 | 35850 | 28600 |
| FL (nm) | 375 | 422 | 437 | 469 | 527 |
| Stokes Shift  (nm/cm-1) | 65/5591 | 116/8983 | 131/9796 | 154/10424 | 210/12570 |
| TOL | Abs(nm) | 311 | 306 | 308 | 317 | 315 |
| ε (L·mol-1·cm-1) | 33950 | 65800 | 51650 | 39850 | 64800 |
| FL (nm) | 413 | 460 | 474 | 539 | 572 |
| Stokes Shift  (nm/cm-1) | 102/7941 | 154/10941 | 166/11370 | 222/12993 | 257/14264 |
| THF | Abs(nm) | 309 | 306 | 305 | 316 | 315 |
| ε (L·mol-1·cm-1) | 35200 | 60950 | 50800 | 44650 | 45500 |
| FL (nm) | 450 | 481 | 495 | 560 | \ |
| Stokes Shift  (nm/cm-1) | 141/10140 | 175/11890 | 190/12585 | 244/13788 | \ |
| DCM | Abs(nm) | 309 | 306 | 308 | 315 | 315 |
| ε (L·mol-1·cm-1) | 36500 | 63300 | 57900 | 42650 | 63300 |
| FL (nm) | 468 | 511 | 532 | 573 | \ |
| Stokes Shift  (nm/cm-1) | 159/10995 | 205/13110 | 224/13671 | 258/14294 | \ |
| MeCN | Abs(nm) | 308 | 306 | 306 | 312 | 306 |
| ε (L·mol-1·cm-1) | 27400 | 60200 | 48700 | 42600 | 59200 |
| FL (nm) | 501 | 528 | 547 | \ | \ |
| Stokes Shift  (nm/cm-1) | 193/12507 | 222/13740 | 241/14398 | \ | \ |


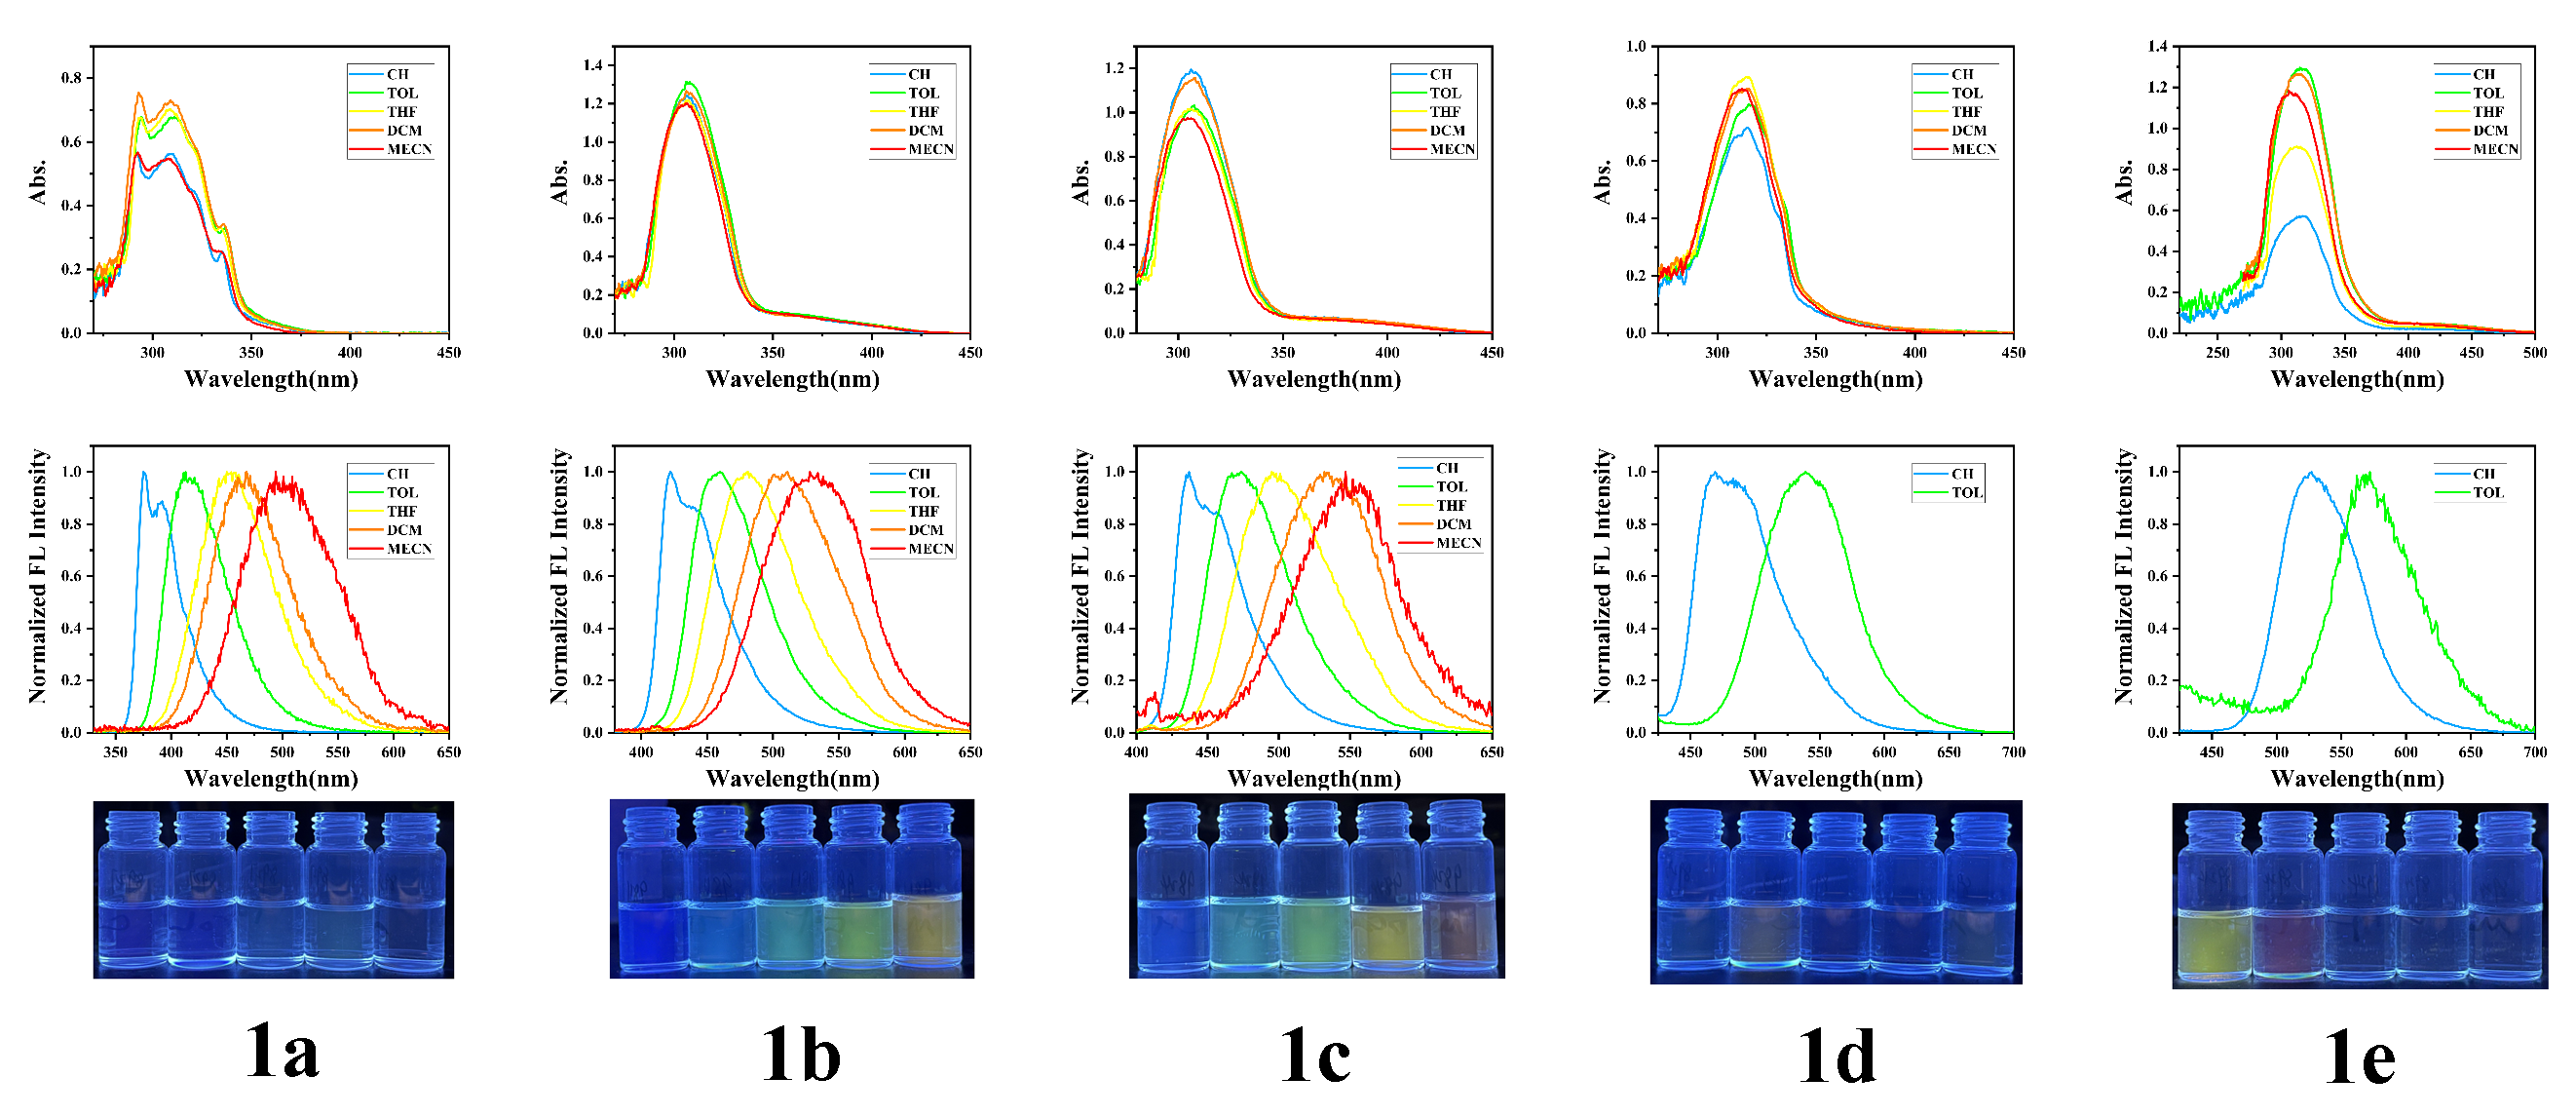


**Figure S13** Solvent effect of 5 compounds


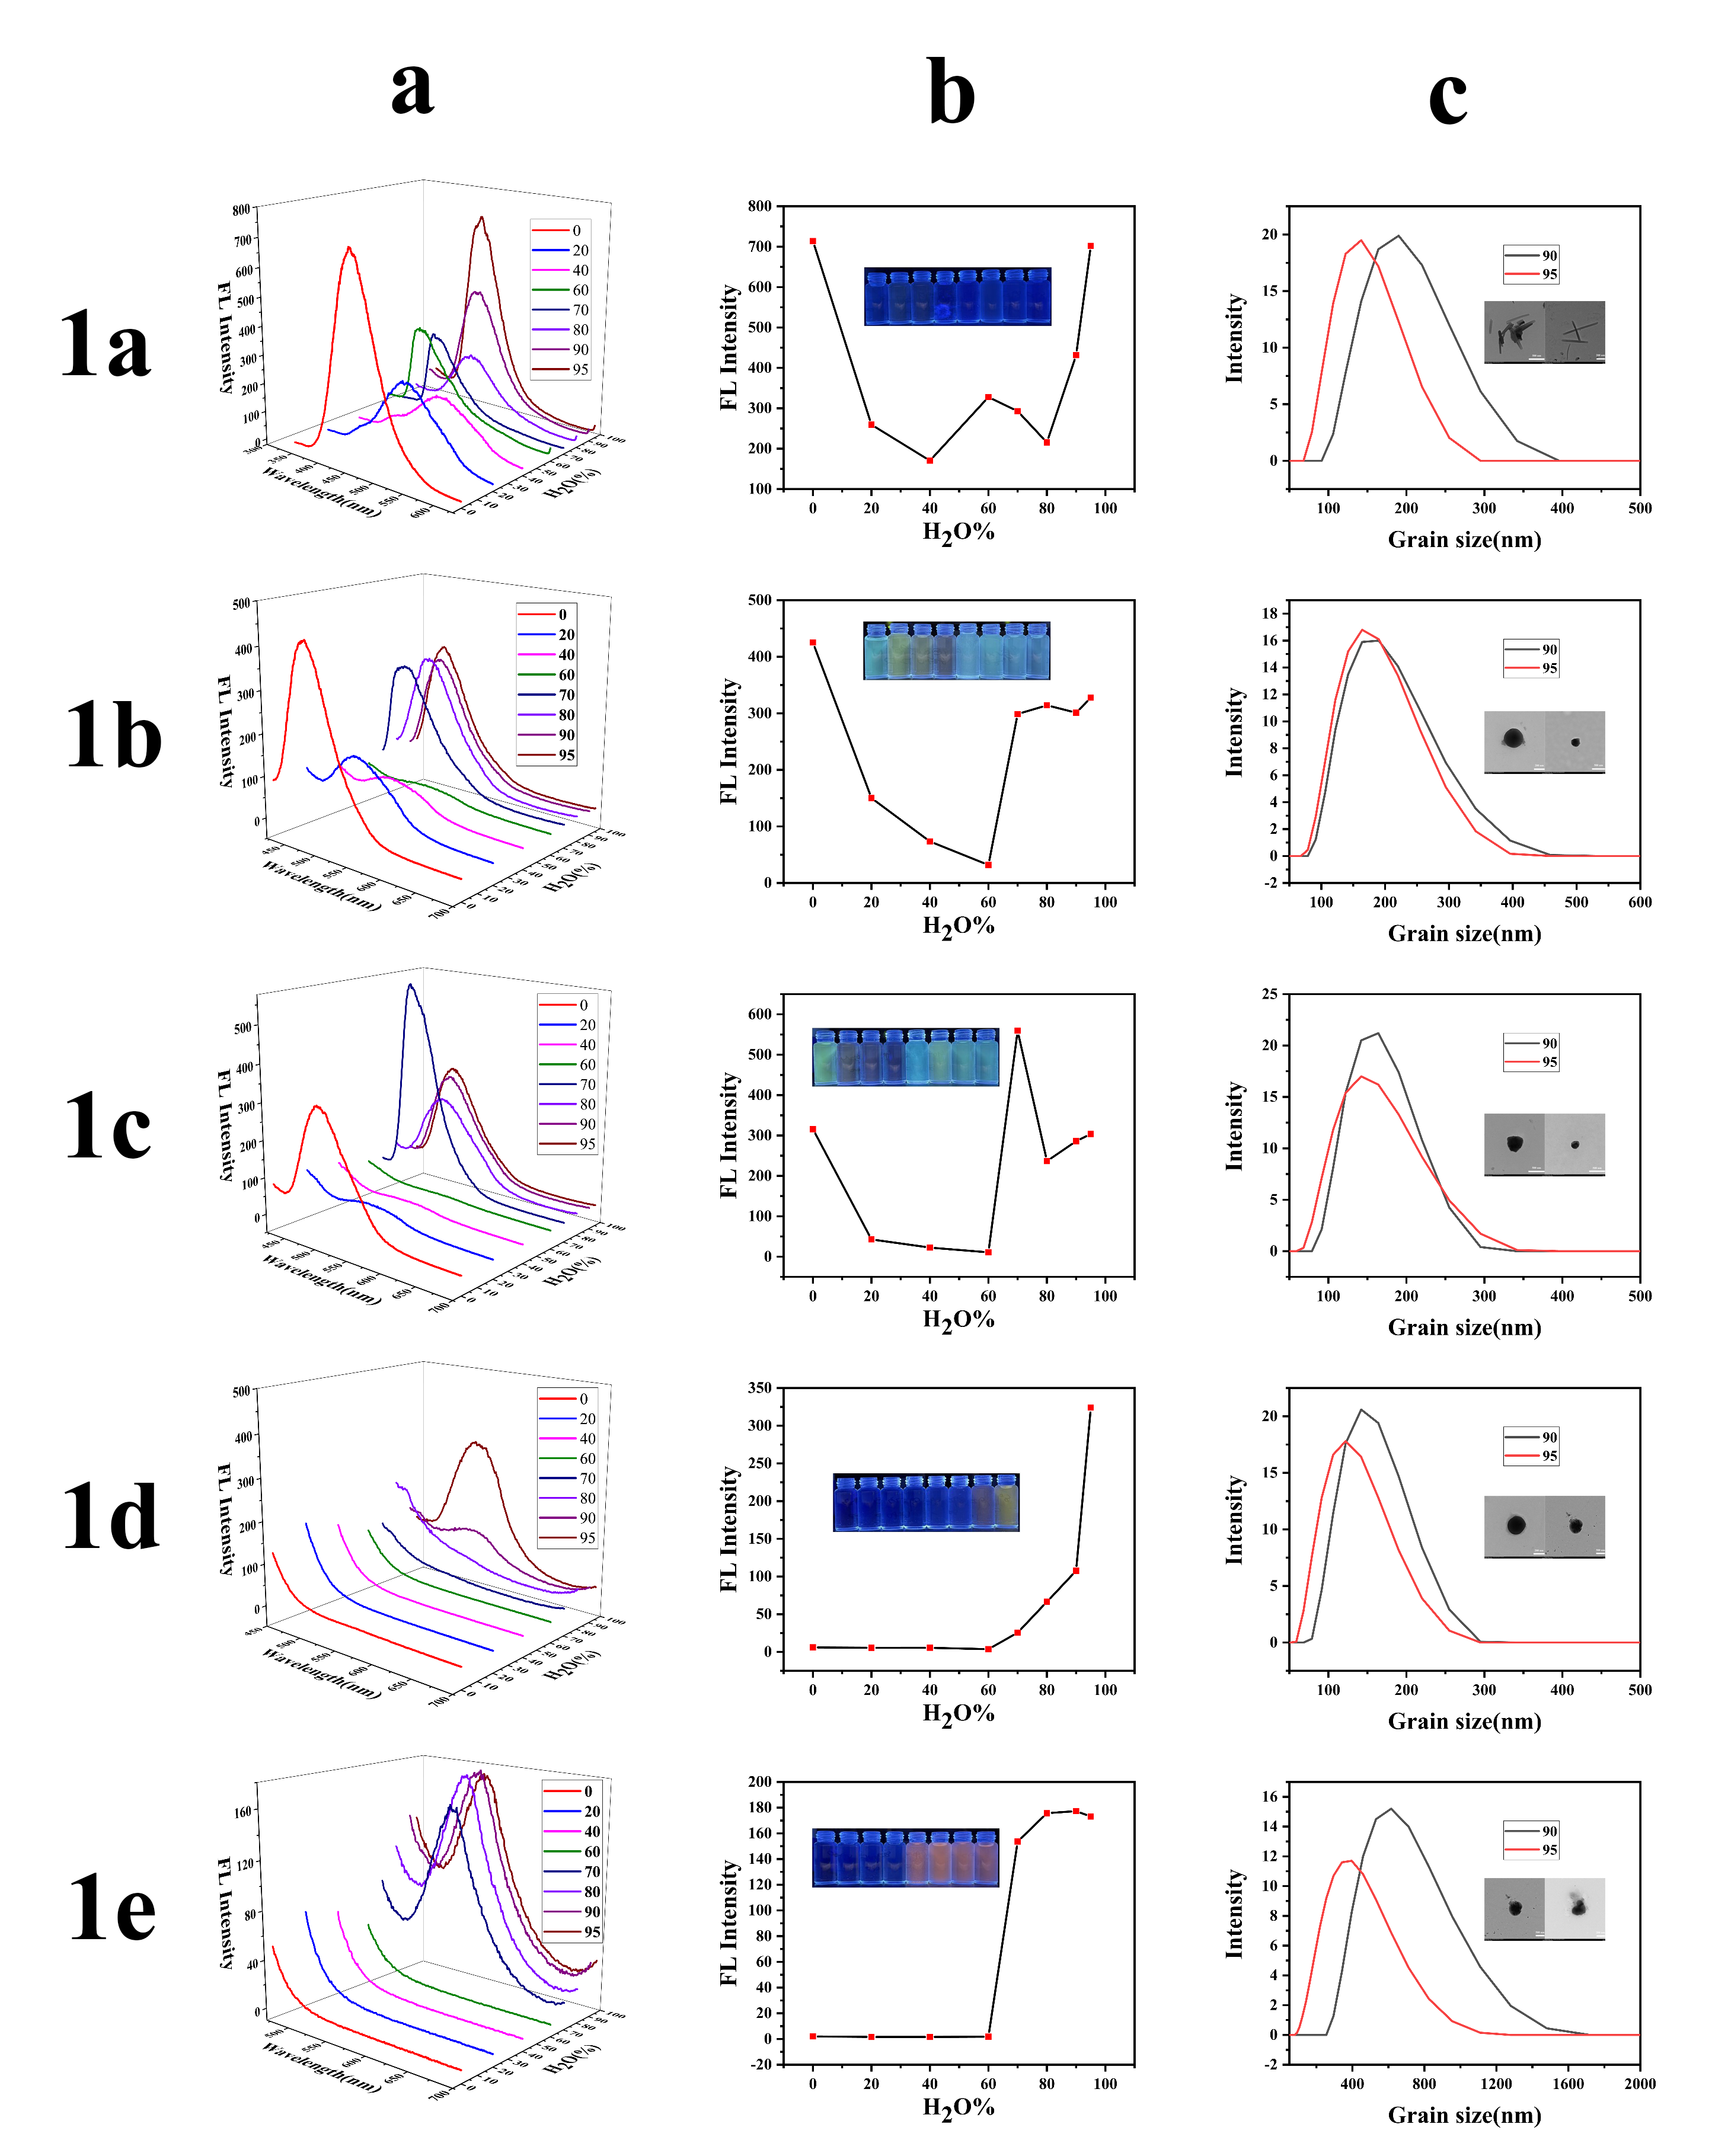


**Figure S14** (a) 3D Emission spectrum in aqueous THF solutions, (b) the relative intensity and photos and (c) DLS (fw = 90%, 95%) of five compounds.


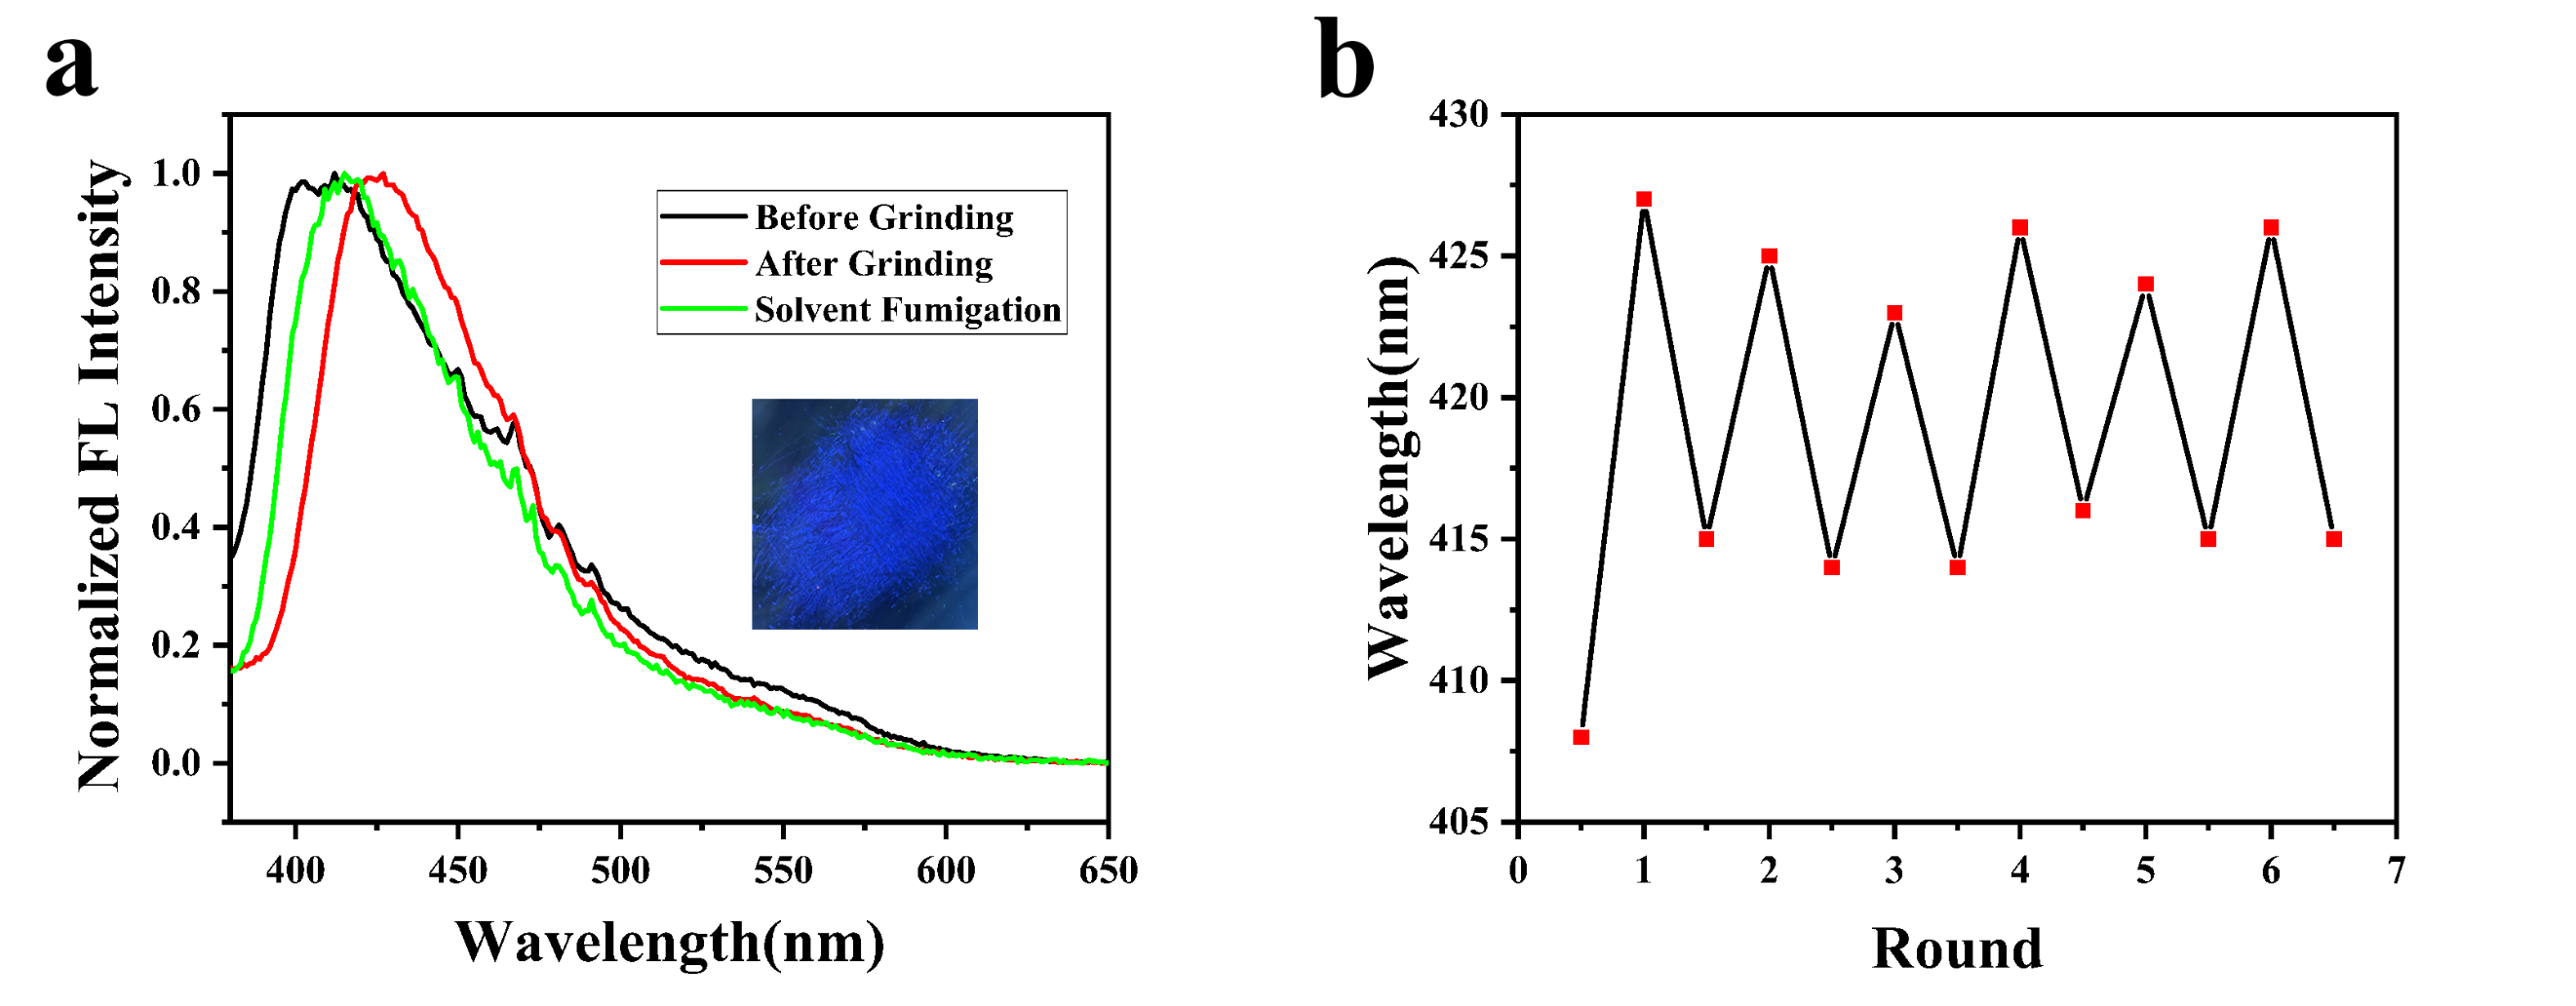


**Figure S15** Mechanochromic property of compounds **1a**; (a) normalized emission spectra; (b) emission cycles.

**
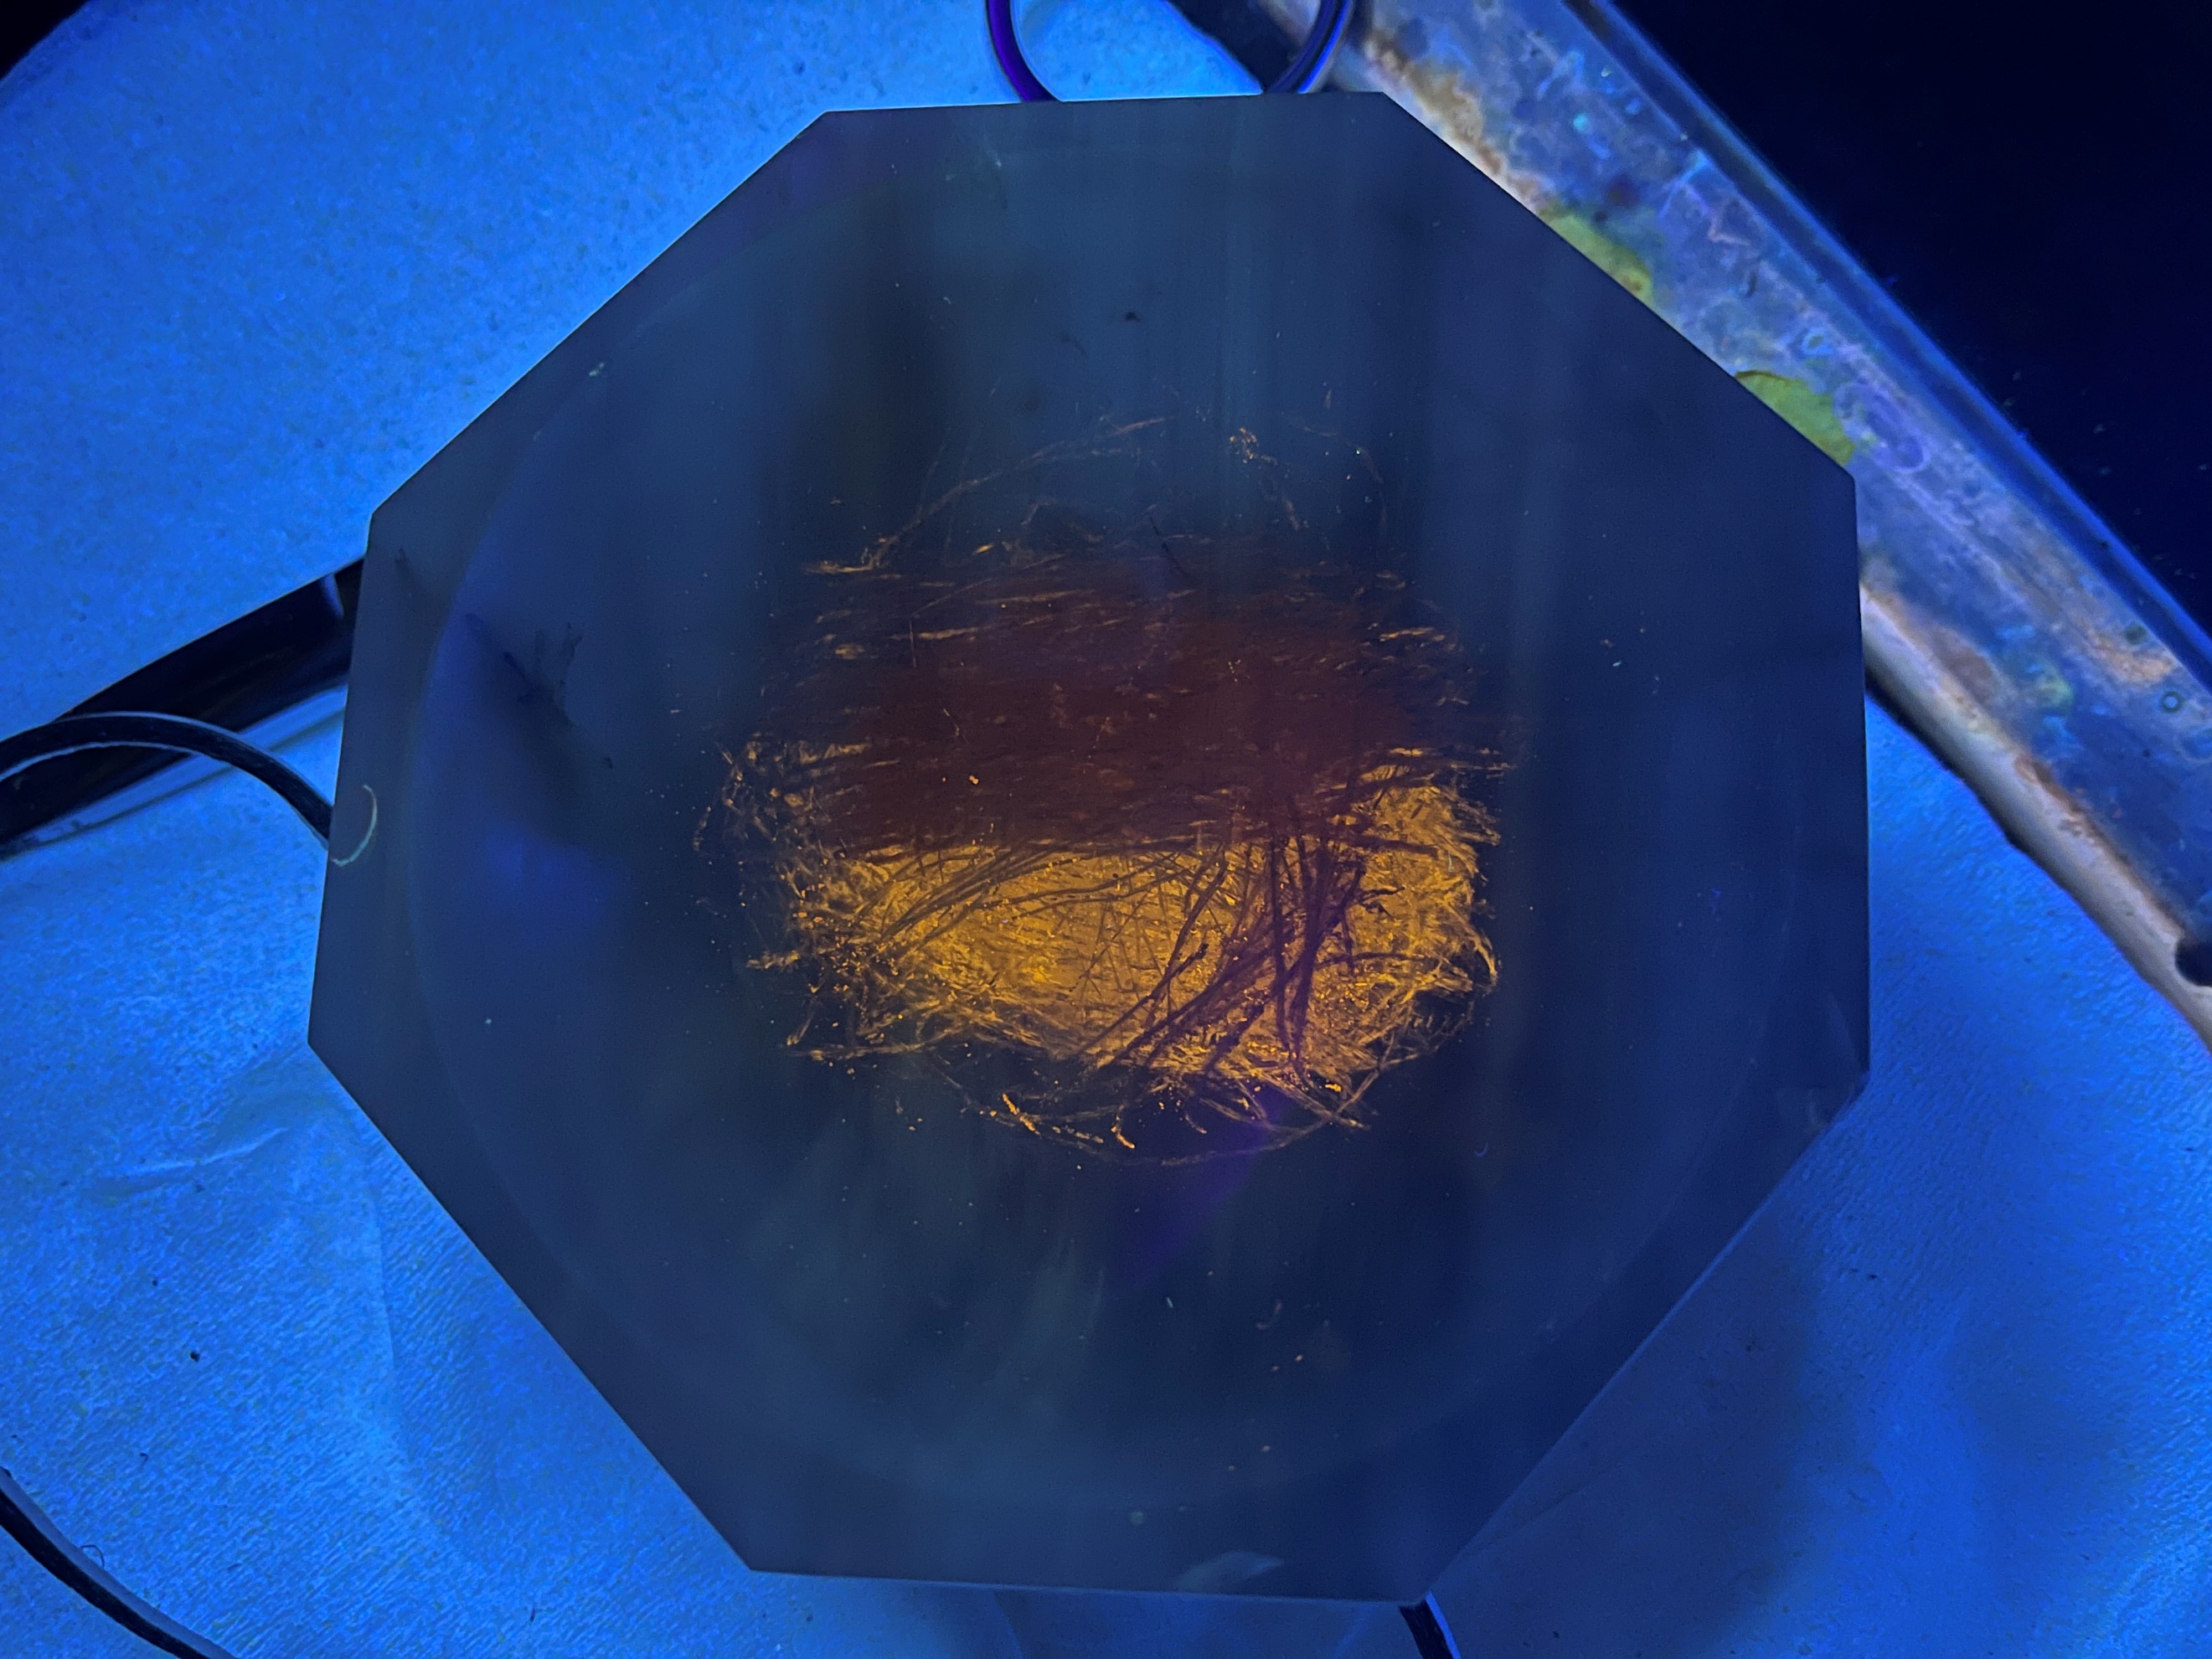
**

**Figure S16** Photo of mechanochromic property of compounds **1e**.

**Table S3 Device performance**

| **Device** | **Emitter** | **Vturn-on(V) a** | **CIE1931(x,y)** | **λEL(nm)** | **EQE(%) b** | **CE(cd/A) b** | **PE(lm/W) b** |
| --- | --- | --- | --- | --- | --- | --- | --- |
| **1** | **1b** | 4.2 | (0.28,0.43) | 514 | 0.73 | 1.70 | 0.94 |
| **2** | **1b**: PVK=1: 4 | 4.2 | (0.17,0.19) | 463 | 0.71 | 0.97 | 0.57 |
| **3** | **1c** | 3.0 | (0.19,0.36) | 482 | 0.82 | 1.73 | 1.36 |
| **4** | **1c**: PVK=1: 4 | 3.5 | (0.19,0.30) | 487 | 0.87 | 1.64 | 1.10 |

a Applied voltage at the luminance of 1 cd/m2.

b Value at 100 cd/m2.


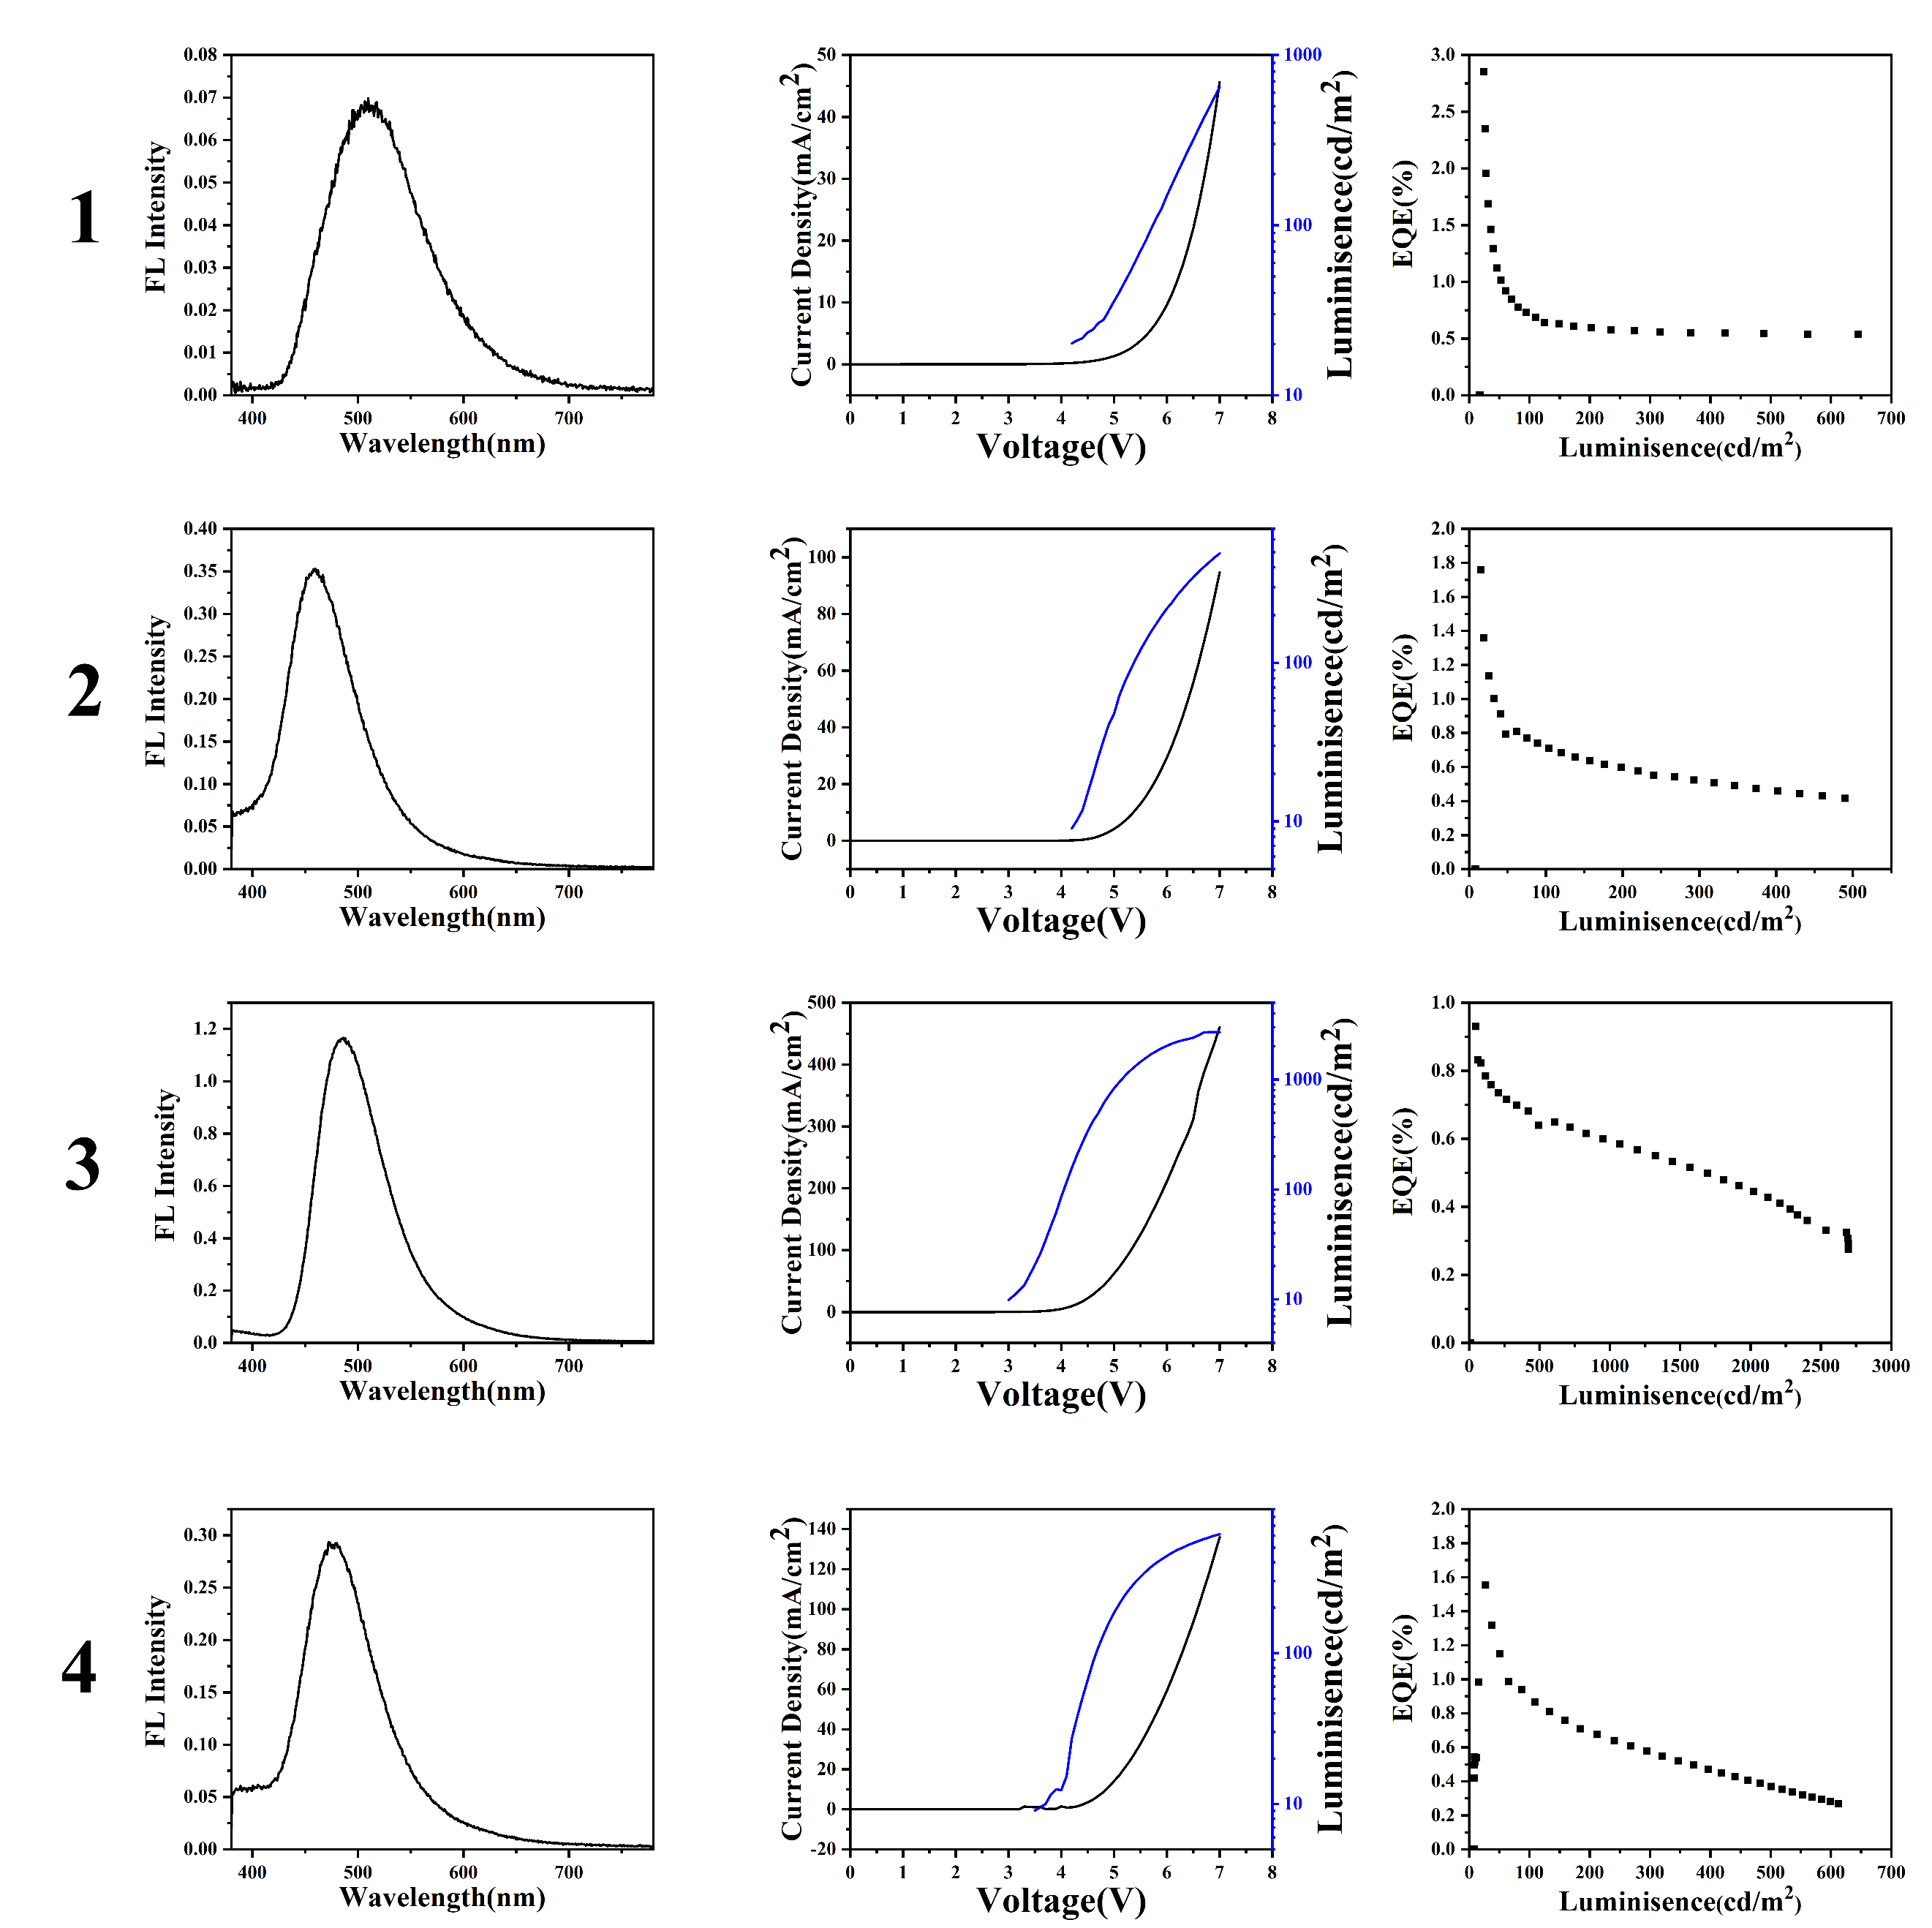


**Figure S17** C-I-V curves of devices **1, 2, 3** and **4**.


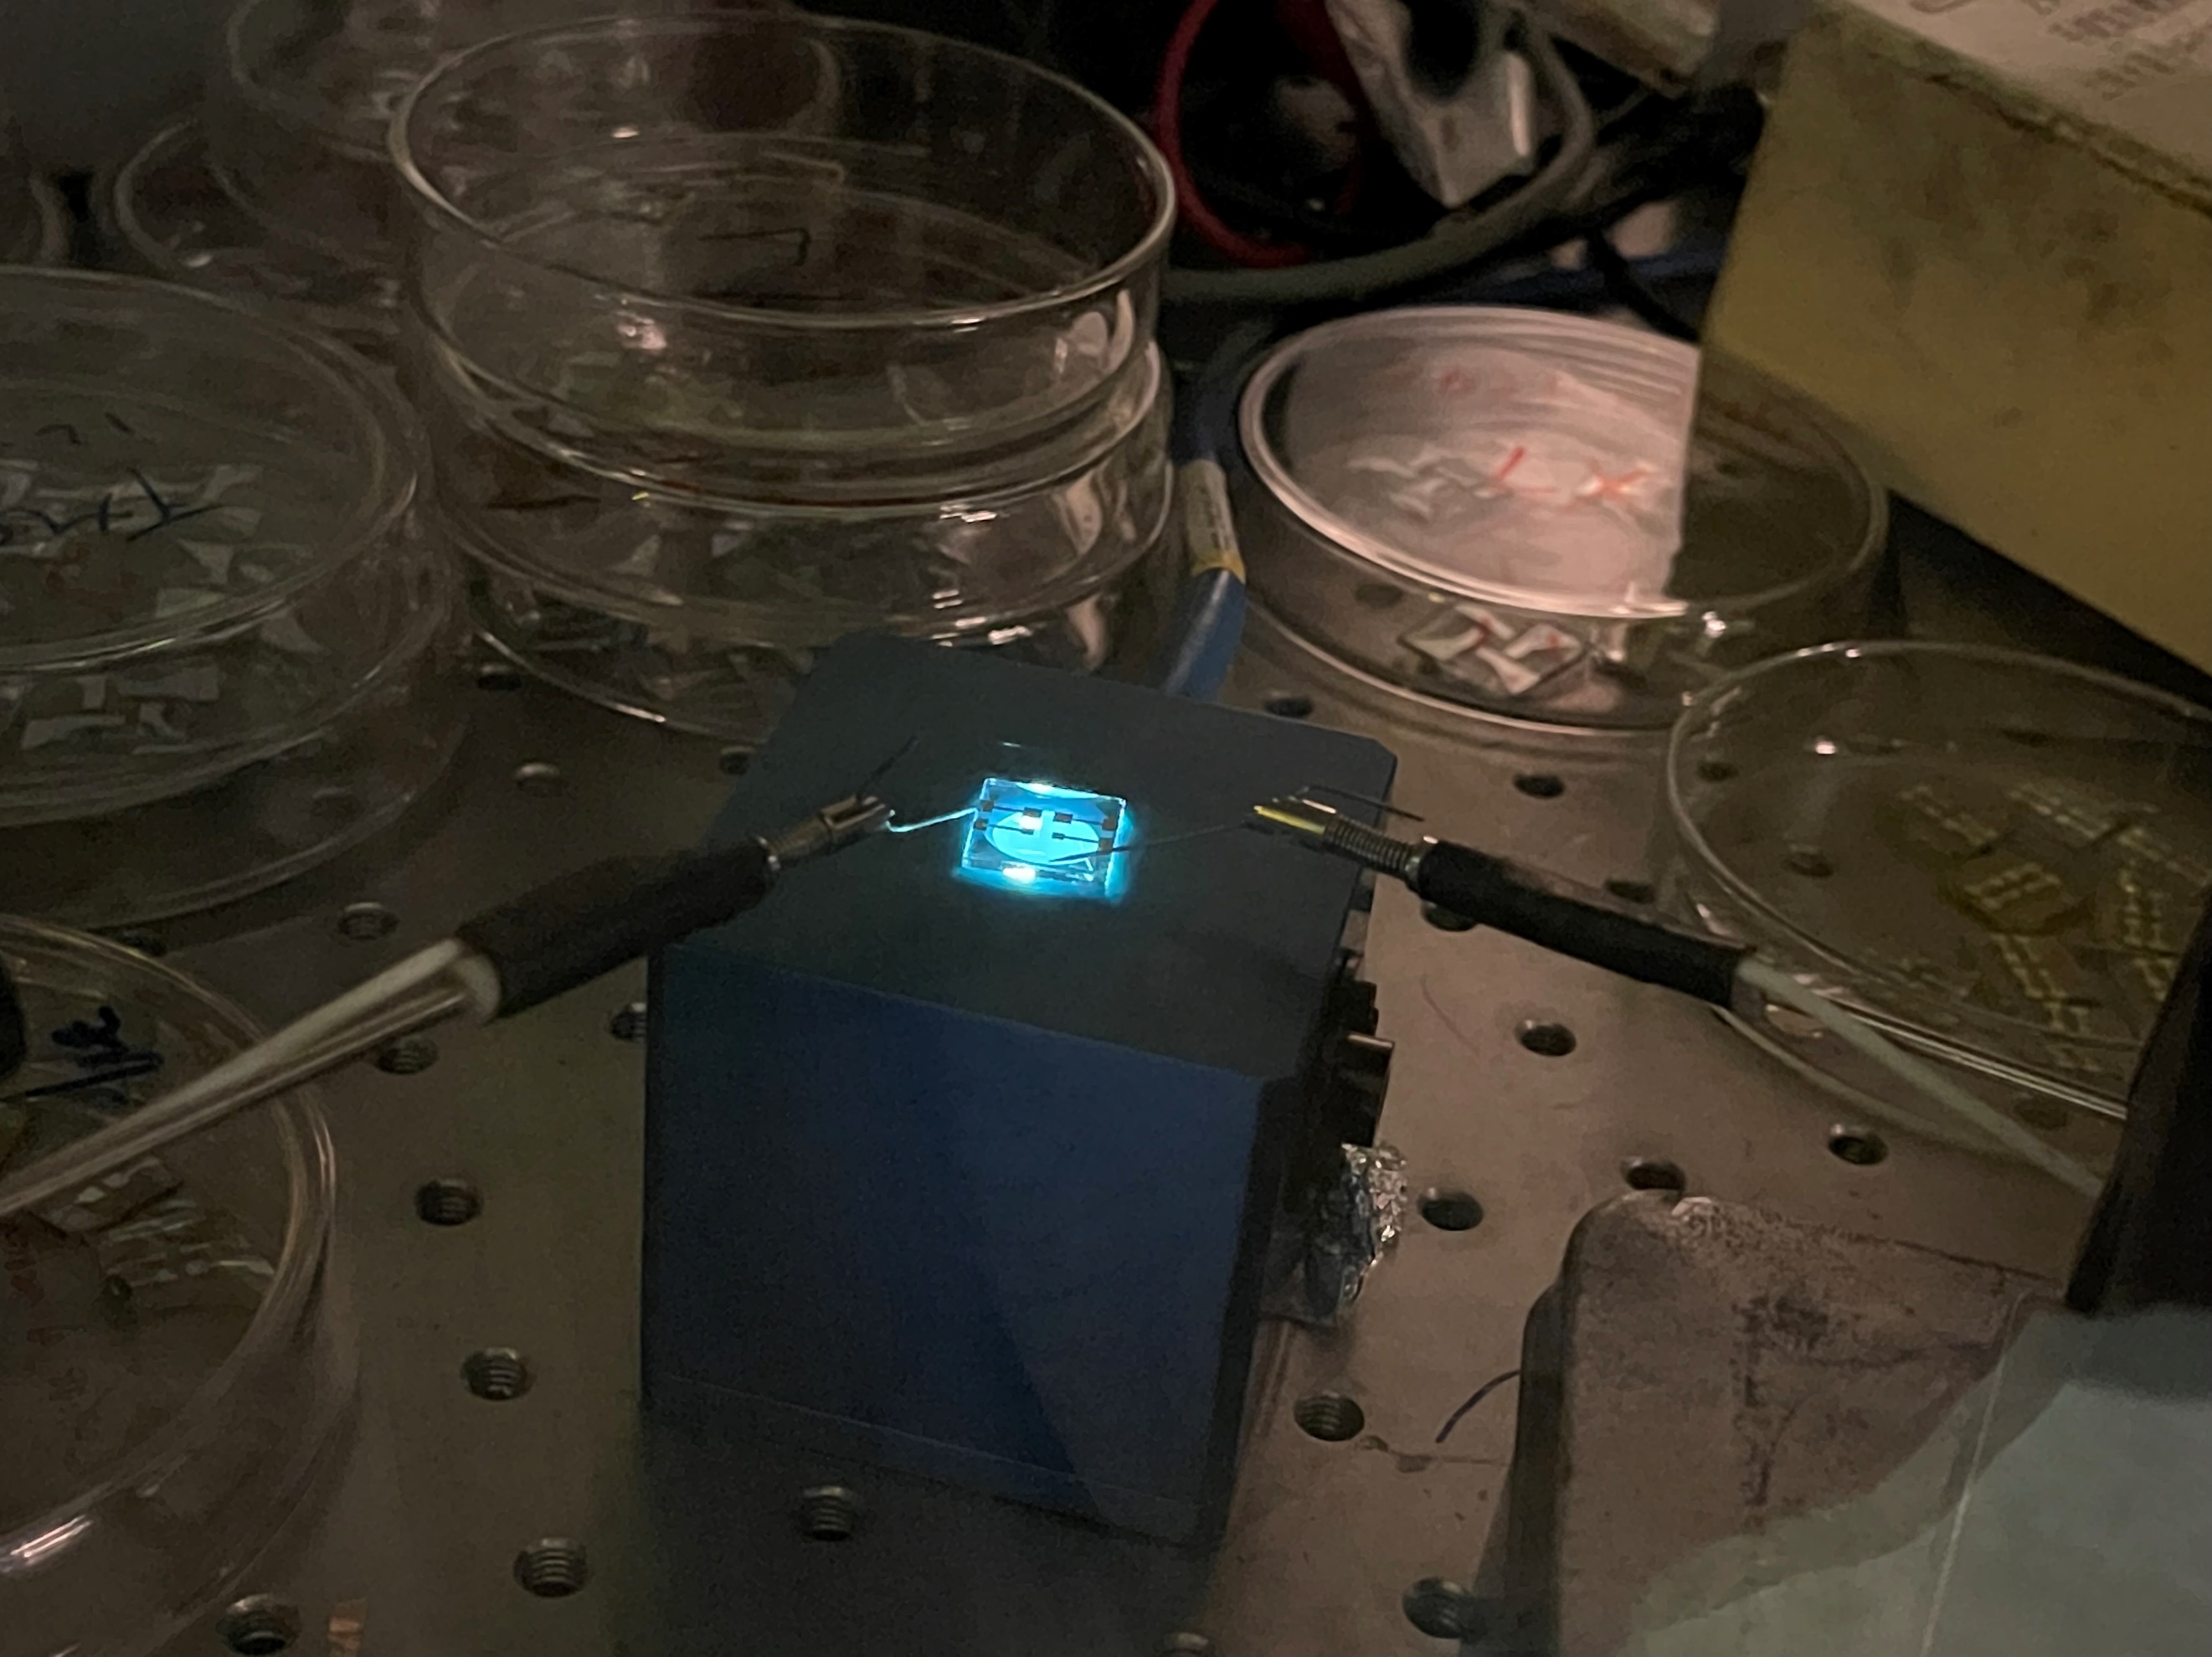

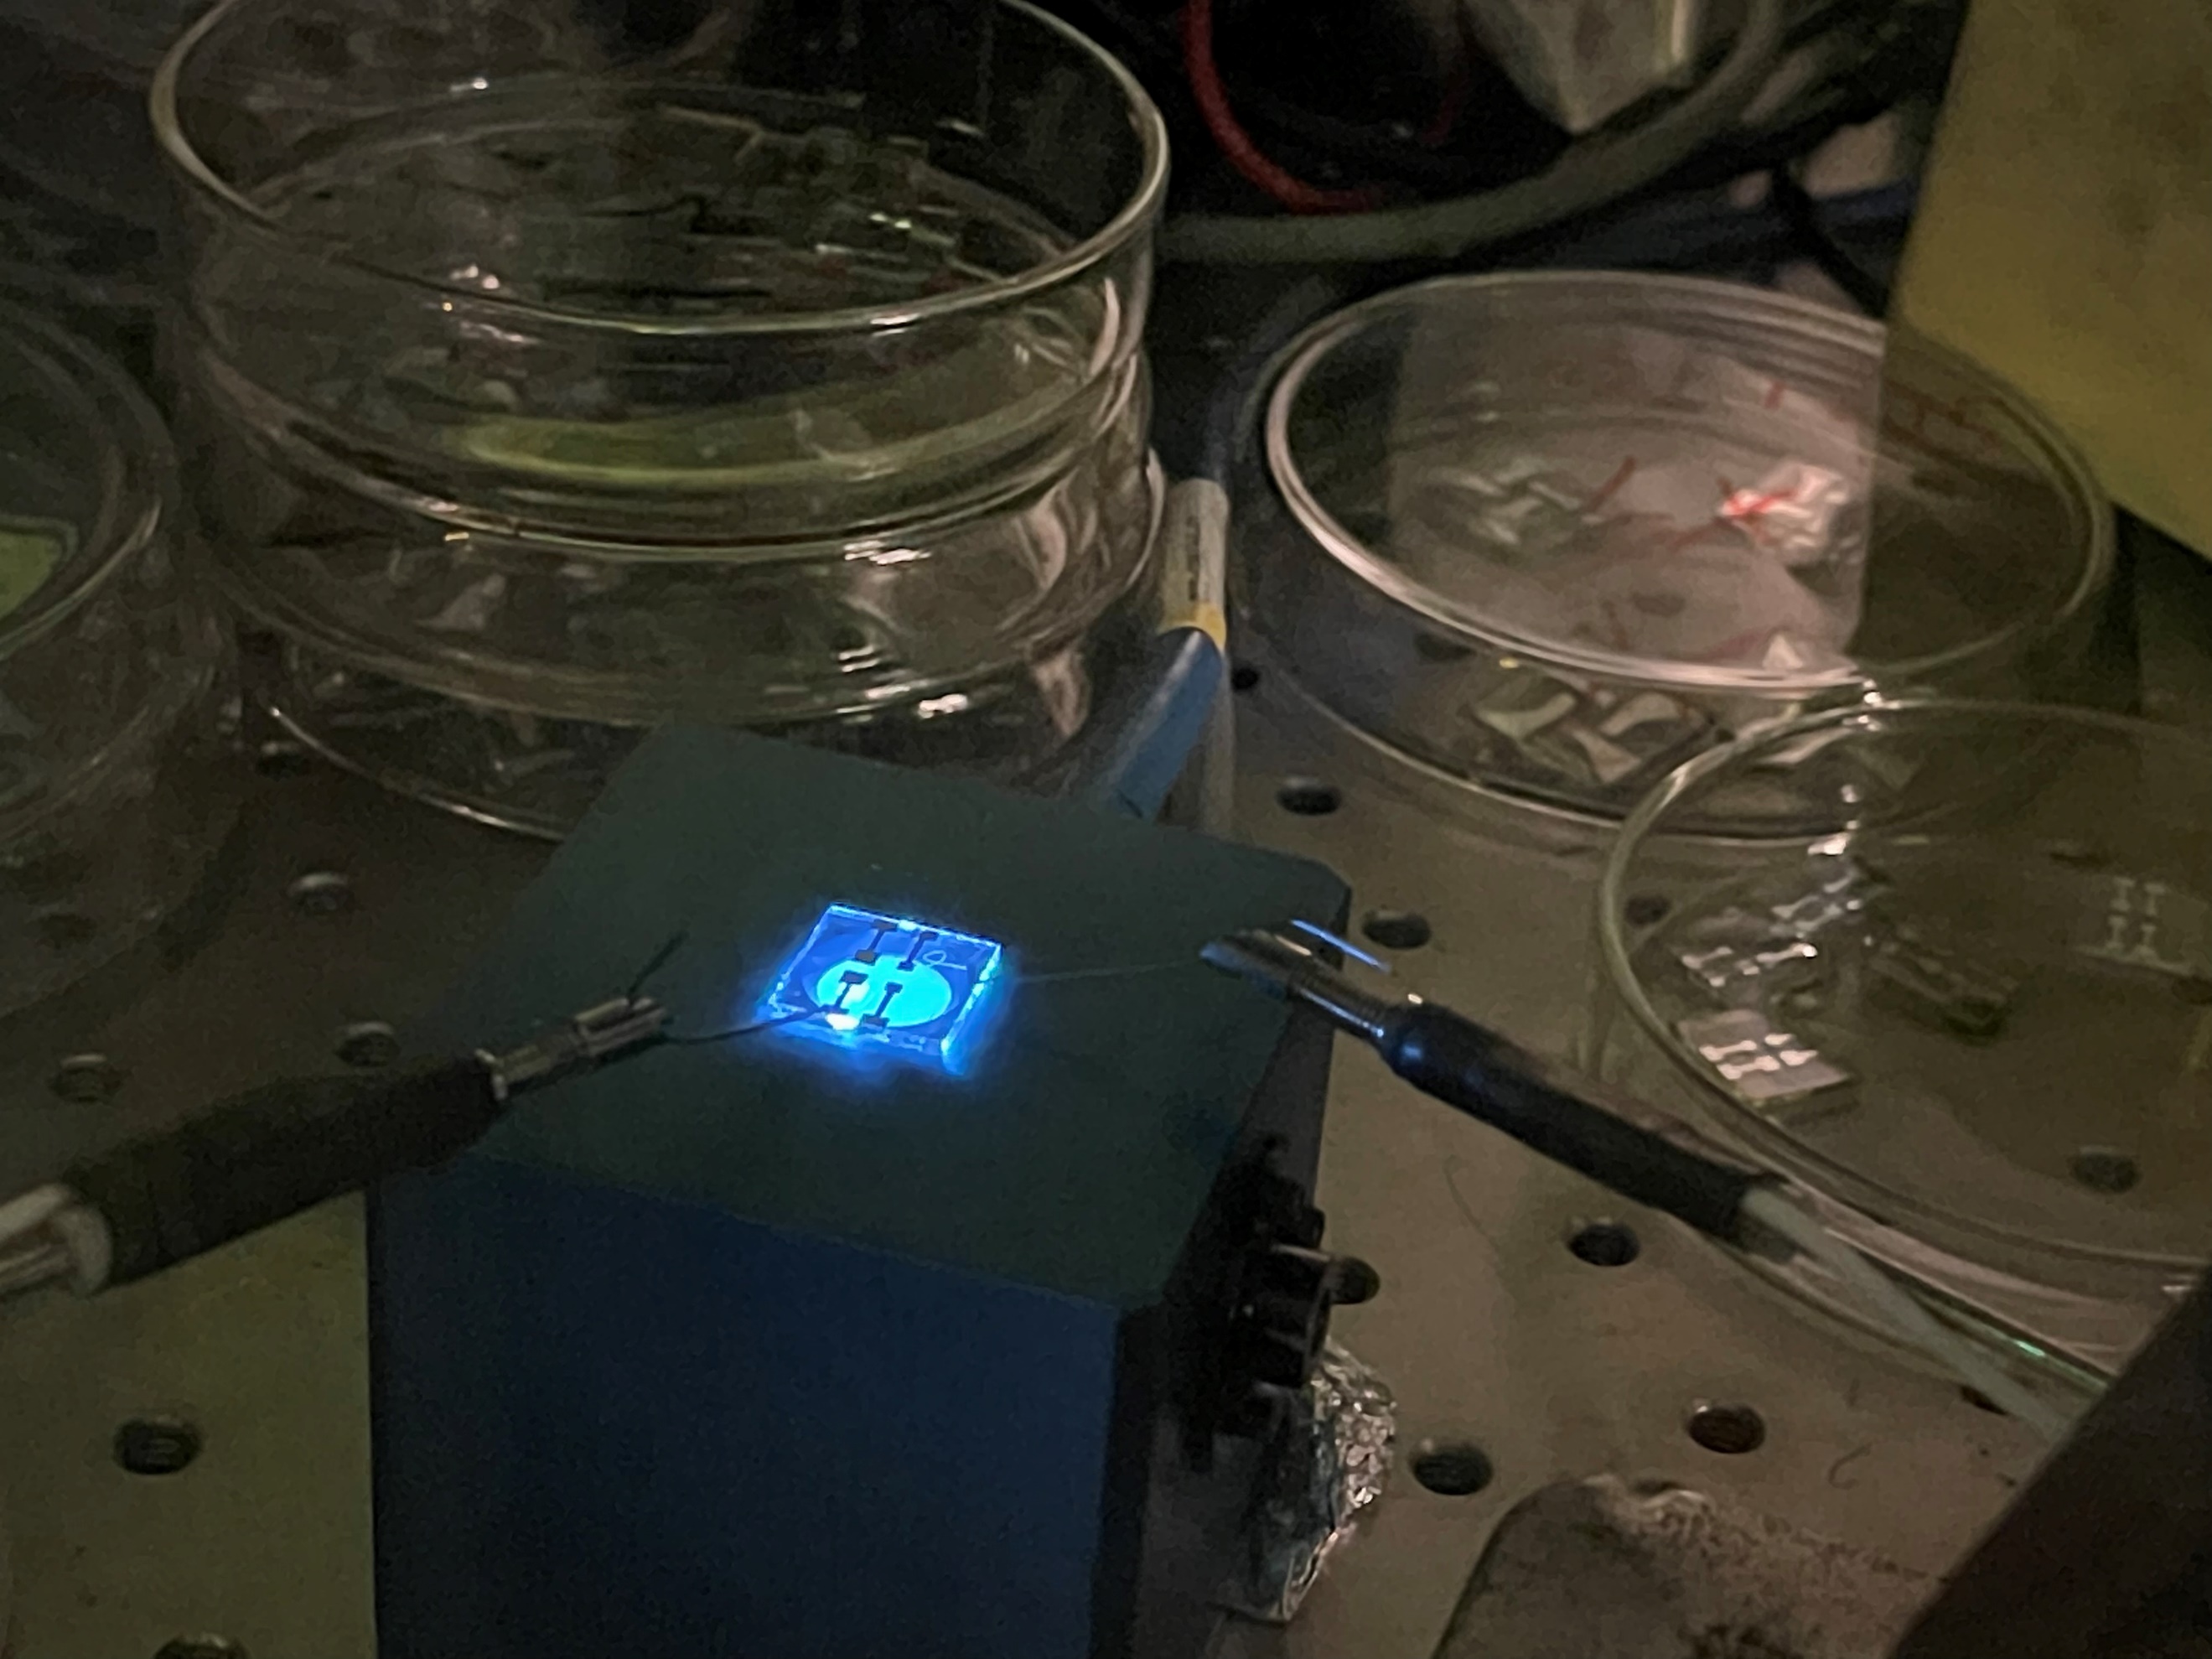

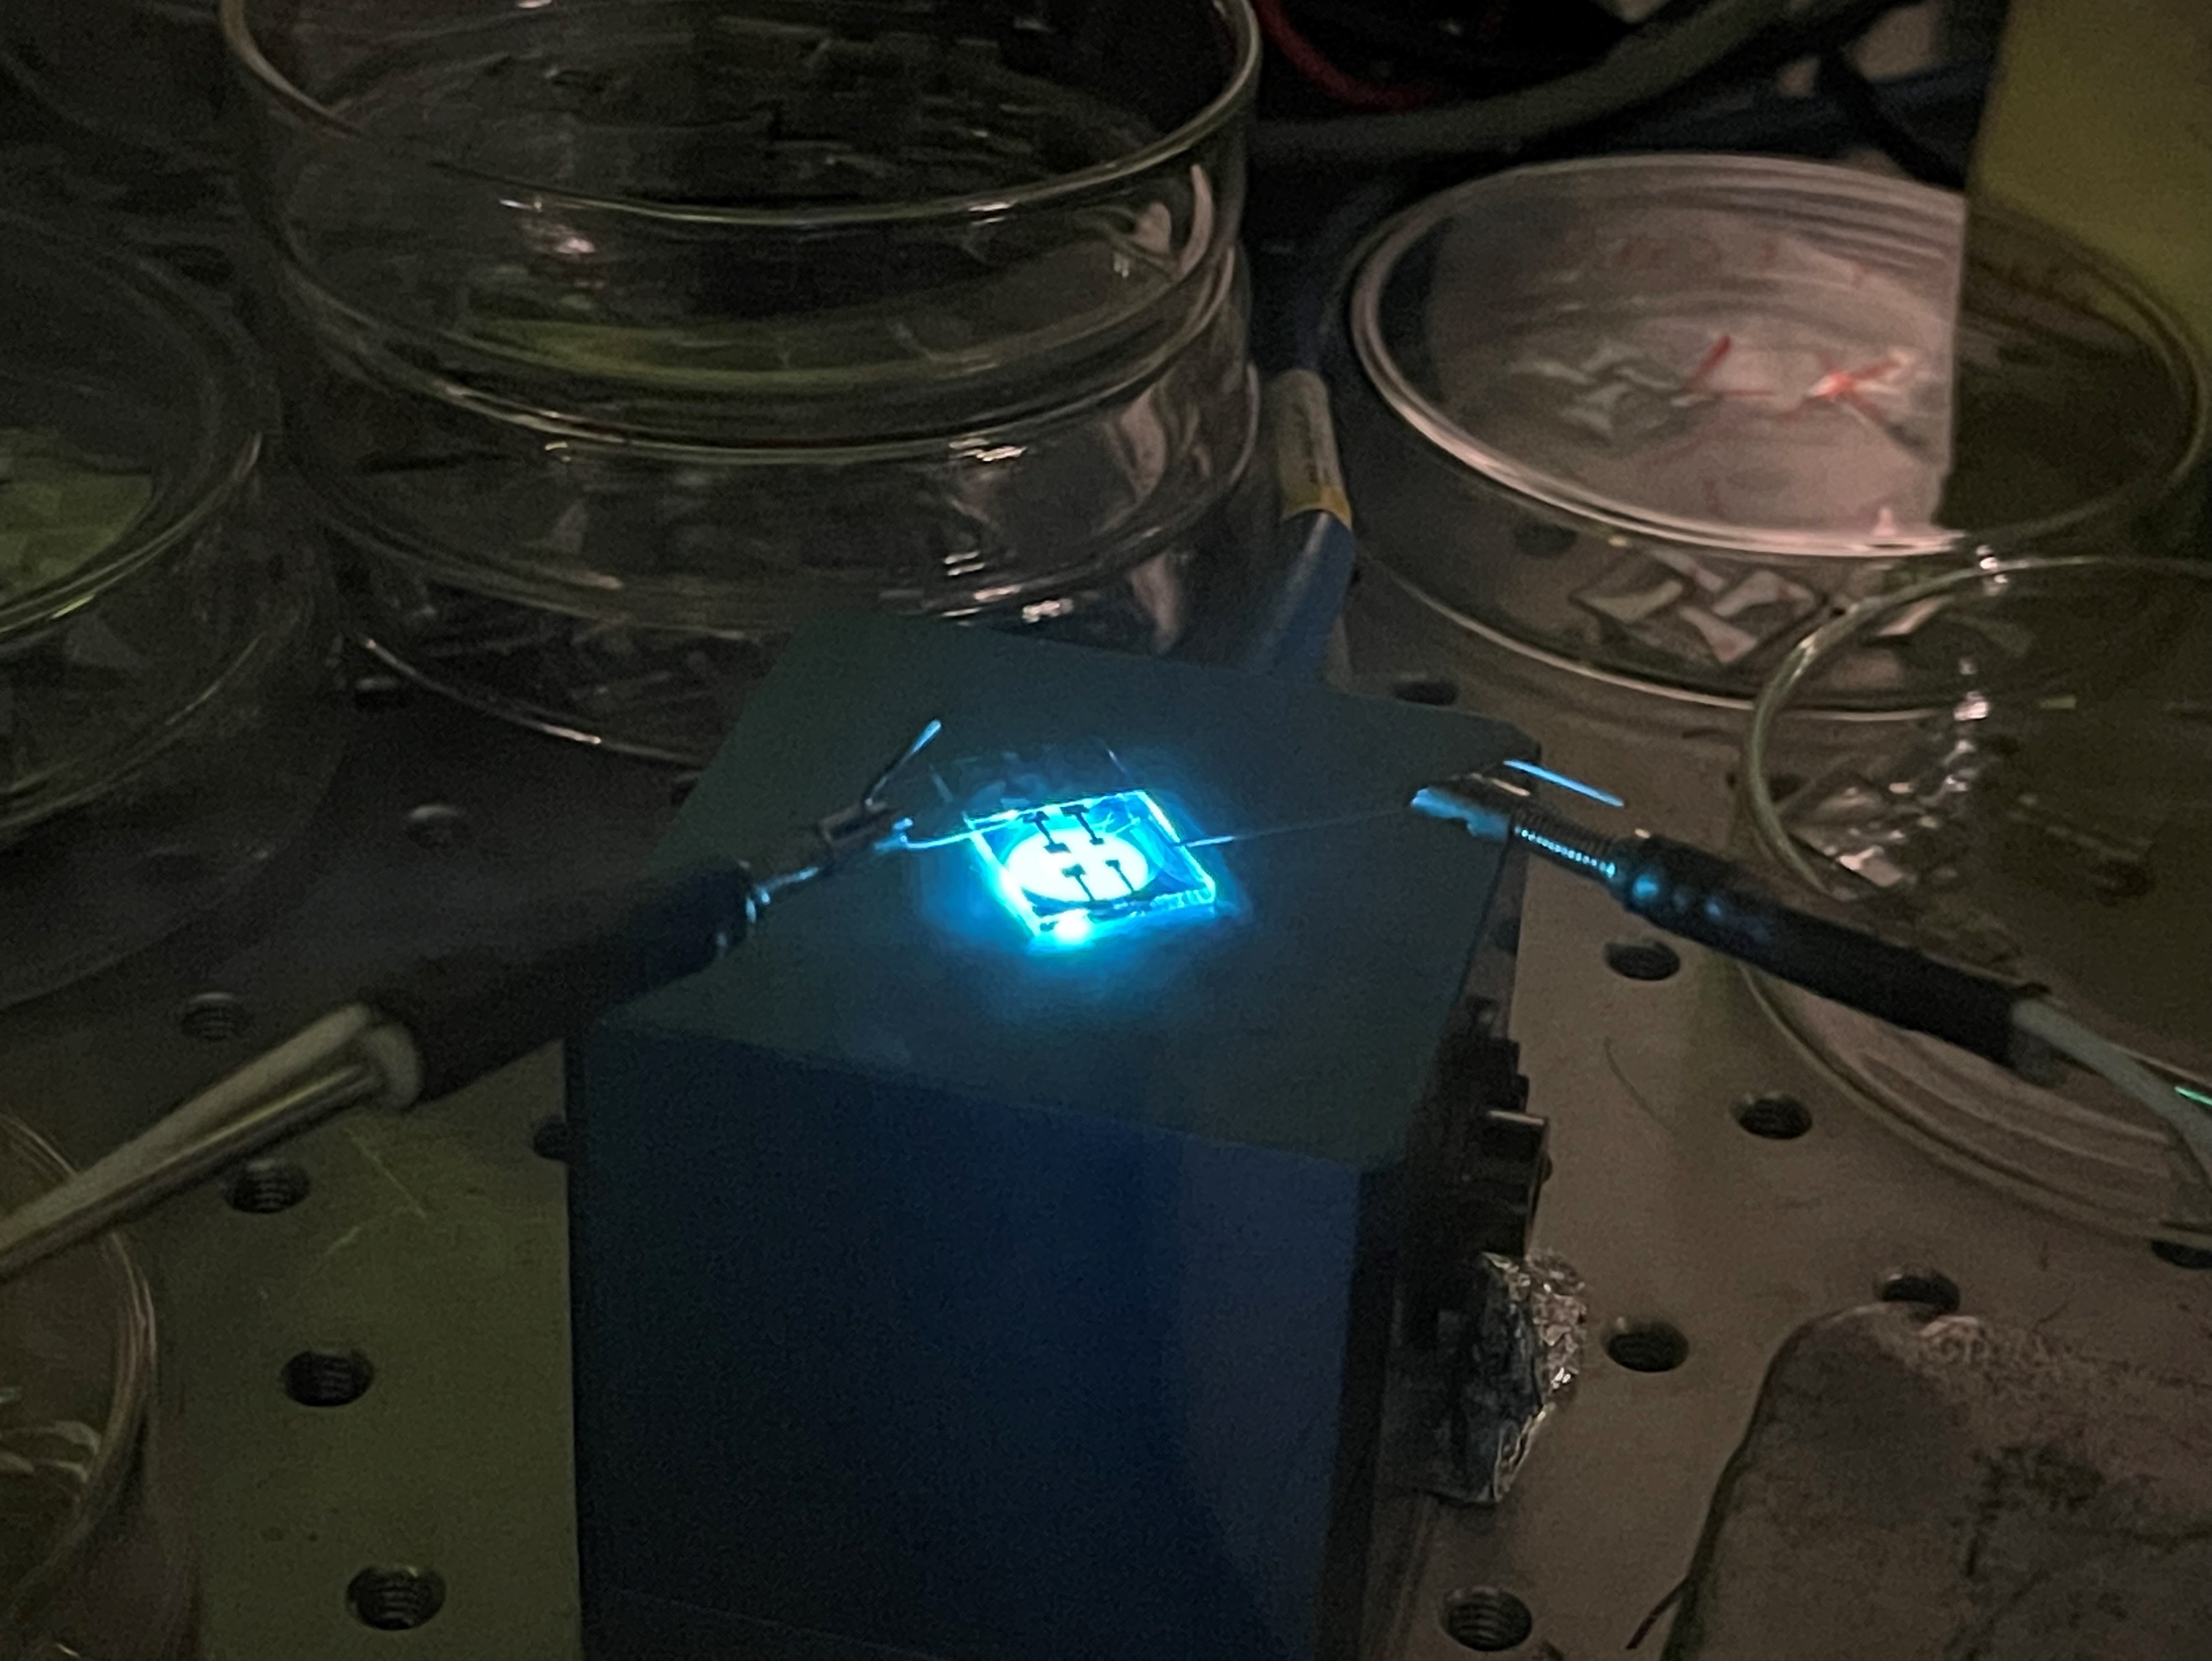

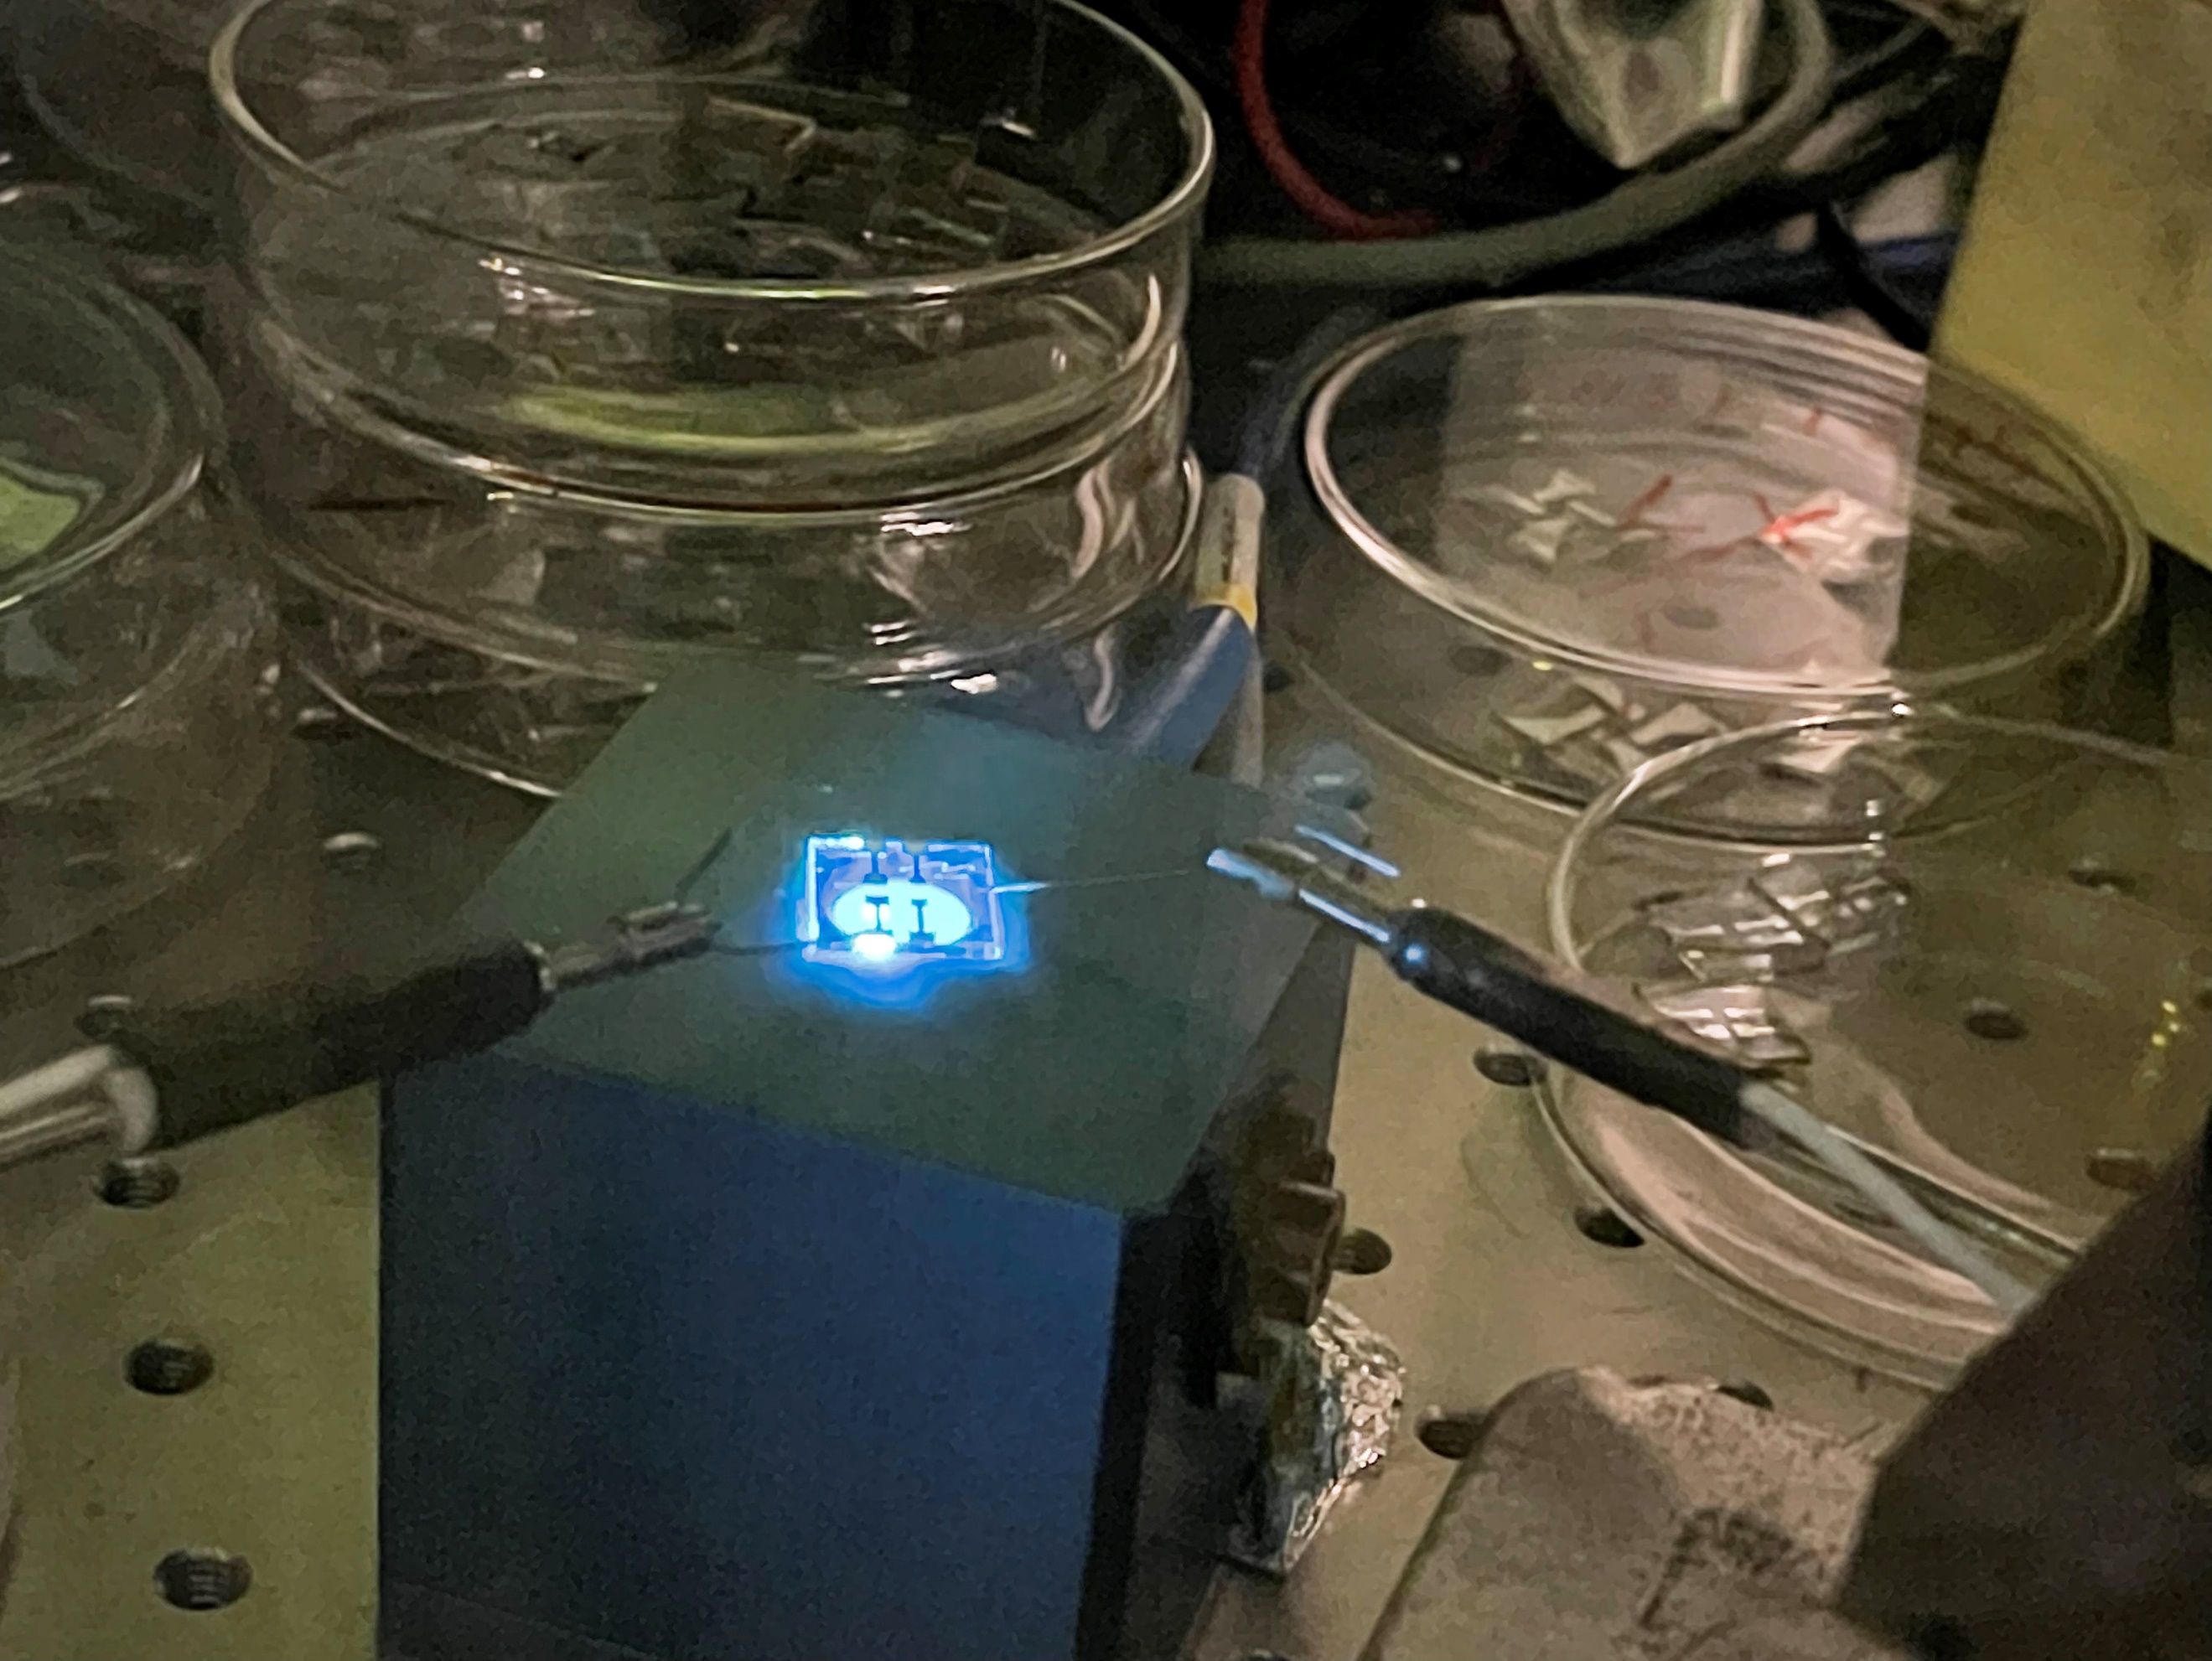


**Figure S18** Photos of devices **1, 2, 3** and **4**.

**Reference**

1. H. Wettach, F. Pasker and S. Höger, *Macromolecules*, 2008, **41**, 9513-9515.
